# Supplementary material for: Herd Routines and Veterinary Advice Related to Drying-Off and the Dry Period of Dairy Cows
Source: MDPI journal article supplement (doi:10.3390/dairy3020029), 2022-06-01
Supplement: s1 [file s1]

**Supplementary Table S1.** Responses to questions about housing system of dairy cows during lactation, drying-off and dry period given by farmers ( $n = 340$ ) participating in a web-based questionnaire.

| Question/Categories                                                                        | Herd n (%) | Significant<br>Herd Variables <sup>1</sup> |
|--------------------------------------------------------------------------------------------|------------|--------------------------------------------|
| How many persons take care of the lactating cows?                                          |            | MP, MS, NC, R                              |
| 1                                                                                          | 45 (13)    |                                            |
| 2-3                                                                                        | 231 (69)   |                                            |
| >3                                                                                         | 60 (18)    |                                            |
| Where are most ( $\geq 50\%$ ) of the lactating cows housed?                               |            | BMSCC, NC,<br>PS                           |
| Free-stalls                                                                                | 235 (70)   |                                            |
| Tie-stalls                                                                                 | 100 (30)   |                                            |
| Type of flooring in cubicles/lying areas for most ( $\geq 50\%$ ) of lactating cows?       |            | BMSCC, MP,<br>MS, NC, PS                   |
| Cubicle mat                                                                                | 157 (46)   |                                            |
| Cubicle mattress                                                                           | 149 (44)   |                                            |
| Deep-straw                                                                                 | 4 (1)      |                                            |
| Other                                                                                      | 27 (8)     |                                            |
| Do you use bedding in cubicles/lying areas for most ( $\geq 50\%$ ) of the lactating cows? |            | na                                         |
| Yes                                                                                        | 332 (99)   |                                            |
| No                                                                                         | 5 (1)      |                                            |
| If bedding is used for lactating cows, which material do you use?                          |            |                                            |
| Peat                                                                                       | 50 (15)    | NC, R                                      |
| Recycled manure                                                                            | 5 (2)      | na                                         |
| Sawdust                                                                                    | 84 (25)    | MP, R                                      |
| Straw, chopped                                                                             | 69 (21)    | MS, R                                      |
| Straw, whole                                                                               | 18 (5)     | MP, MS, NC, R                              |
| Wood shavings                                                                              | 191 (58)   | R                                          |
| Other                                                                                      | 15 (5)     | na                                         |
| Is the housing (see above) of cows different during drying-off compared to lactation?      |            | R                                          |
| Yes                                                                                        | 102 (30)   |                                            |
| No                                                                                         | 235 (70)   |                                            |

|                                                                                                                             |          |               |
|-----------------------------------------------------------------------------------------------------------------------------|----------|---------------|
| If housing is different, where are most ( $\geq 50\%$ ) of the cows housed during drying-off?                               |          | na            |
| Free-stalls                                                                                                                 | 70 (69)  |               |
| Tie-stalls                                                                                                                  | 27 (26)  |               |
| Other                                                                                                                       | 6 (6)    |               |
| If housing is different, which type of flooring in cubicles/lying areas for most ( $\geq 50\%$ ) cows during drying-off?    |          | na            |
| Cubicle mat                                                                                                                 | 40 (39)  |               |
| Cubicle mattress                                                                                                            | 10 (10)  |               |
| Deep-straw                                                                                                                  | 43 (42)  |               |
| Other                                                                                                                       | 10 (9)   |               |
| If housing is different, do you use bedding in cubicles/lying areas for most ( $\geq 50\%$ ) of the cows during drying-off? |          | na            |
| Yes                                                                                                                         | 97 (98)  |               |
| No                                                                                                                          | 2 (2)    |               |
| If housing is different and bedding is used for cows during drying-off, which material do you use?                          |          | na            |
| Peat                                                                                                                        | 5 (5)    |               |
| Recycled manure                                                                                                             | 0 (0)    |               |
| Sawdust                                                                                                                     | 19 (20)  |               |
| Straw, chopped                                                                                                              | 19 (20)  |               |
| Straw, whole                                                                                                                | 27 (28)  |               |
| Wood shavings                                                                                                               | 41 (42)  |               |
| Other                                                                                                                       | 7 (7)    |               |
| Is the housing (see above) of cows different during the dry period compared to lactation?                                   |          | MP, MS, NC, R |
| Yes                                                                                                                         | 121 (36) |               |
| No                                                                                                                          | 215 (64) |               |
| If housing is different, where are most ( $\geq 50\%$ ) of the cows housed during the dry period?                           |          | na            |
| Free-stalls                                                                                                                 | 79 (65)  |               |
| Tie-stalls                                                                                                                  | 27 (23)  |               |
| Other                                                                                                                       | 13 (11)  |               |

|                                                                                                                                 |          |    |
|---------------------------------------------------------------------------------------------------------------------------------|----------|----|
| If housing is different, which type of flooring in cubicles/lying areas for most ( $\geq 50\%$ ) cows during the dry period?    |          | NC |
| Cubicle mat                                                                                                                     | 47 (39)  |    |
| Cubicle mattress                                                                                                                | 5 (4)    |    |
| Deep-straw                                                                                                                      | 61 (50)  |    |
| Other                                                                                                                           | 11 (7)   |    |
| If housing is different, do you use bedding in cubicles/lying areas for most ( $\geq 50\%$ ) of the cows during the dry period? |          | na |
| Yes                                                                                                                             | 113 (96) |    |
| No                                                                                                                              | 5 (4)    |    |
| If housing is different and bedding is used for cows during drying-off, which material do you use?                              |          | na |
| Peat                                                                                                                            | 9 (8)    |    |
| Recycled manure                                                                                                                 | 0 (0)    |    |
| Sawdust                                                                                                                         | 13 (12)  |    |
| Straw, chopped                                                                                                                  | 30 (27)  |    |
| Straw, whole                                                                                                                    | 46 (41)  |    |
| Wood shavings                                                                                                                   | 43 (38)  |    |
| Other                                                                                                                           | 4 (3)    |    |

---

<sup>1</sup> na = not analysed; BMSCC = bulk milk somatic cell count; PS = production system, MP = milk production; MS = milking system; NC = number of cows/herd; R = region.

**Supplementary Table S2.** Significant associations between herd variables and responses to questions about routines during drying-off of dairy cows given by farmers ( $n = 340$ ) participating in a web-based questionnaire as analysed using univariable logistic or multinomial logistic regression models

| Do you have written routines for these cows?   | Yes<br>N (%) | No<br>N (%) | OR <sup>1</sup>   | $p$ -value <sup>2</sup> |
|------------------------------------------------|--------------|-------------|-------------------|-------------------------|
| Milk production, kg ECM <sup>3</sup> /cow/year |              |             |                   | R <sup>2</sup> = 0.03   |
| <9,000                                         | 6 (15)       | 34 (85)     | Ref. <sup>1</sup> |                         |
| 9,000-11,000                                   | 63 (32)      | 131 (68)    | 2.72              | 0.03                    |
| >11,000                                        | 48 (48)      | 53 (52)     | 5.13              | 0.001                   |
| Milking system                                 |              |             |                   | R <sup>2</sup> = 0.08   |
| AMS <sup>4</sup>                               | 48 (34)      | 93 (66)     | 0.45              | 0.006                   |
| Tie-stall                                      | 16 (15)      | 89 (85)     | 0.15              | <0.001                  |
| Parlour                                        | 42 (53)      | 37 (47)     | Ref.              |                         |
| Rotary                                         | 9 (100)      | 0 (0)       | -                 | -                       |
| Combinations                                   | 2 (66)       | 1 (33)      | 1.76              | 0.65                    |
| Number of cows/herd                            |              |             |                   | R <sup>2</sup> = 0.07   |
| <53                                            | 14 (17)      | 69 (83)     | Ref.              |                         |
| 53-77                                          | 24 (29)      | 59 (71)     | 2.00              | 0.07                    |
| 78-137                                         | 33 (39)      | 51 (61)     | 3.19              | 0.002                   |
| ≥138                                           | 46 (54)      | 39 (46)     | 5.81              | <0.001                  |

<sup>1</sup>OR = odds ratio; Ref. = referent. <sup>2</sup>R<sup>2</sup> = coefficient of variation (the proportion of the variation in the dependent variable that is predictable from the independent variable). <sup>3</sup>ECM = energy-corrected milk. <sup>4</sup>AMS = automatic milking system.

| How many persons take care of these cows?      | 1<br>N (%) | 2-3<br>N (%) | >3<br>N (%) | RRR <sup>1</sup> | $p$ -value <sup>2</sup> |
|------------------------------------------------|------------|--------------|-------------|------------------|-------------------------|
| Milk production, kg ECM <sup>3</sup> /cow/year |            |              |             |                  | R <sup>2</sup> = 0.02   |
| <9,000                                         | 23 (57)    | 16 (40)      |             | Ref.             |                         |
| 9,000-11,000                                   | 71 (36)    | 118 (61)     |             | 0.42             | 0.02                    |
| >11,000                                        | 34 (34)    | 57 (56)      |             | 0.41             | 0.02                    |
| <9,000                                         |            | 16 (40)      | 1 (3)       | 1.23             | 0.85                    |
| 9,000-11,000                                   |            | 118 (61)     | 6 (3)       | Ref.             |                         |
| >11,000                                        |            | 57 (56)      | 10 (10)     | 3.45             | 0.02                    |
| <9,000                                         | 23 (57)    |              | 1 (3)       | 0.51             | 0.55                    |
| 9,000-11,000                                   | 71 (36)    |              | 6 (3)       | Ref.             |                         |
| >11,000                                        | 34 (34)    |              | 10 (10)     | 3.48             | 0.03                    |
| Milking system                                 |            |              |             |                  | R <sup>2</sup> = 0.06   |
| AMS <sup>4</sup>                               | 59 (42)    | 78 (55)      |             | 0.41             | 0.006                   |
| Tie-stall                                      | 53 (50)    | 50 (48)      |             | 0.29             | <0.001                  |
| Parlour                                        | 17 (22)    | 55 (70)      |             | Ref.             |                         |
| Rotary                                         | 0 (0)      | 6 (67)       |             | -                | -                       |
| Combinations                                   | 1 (33)     | 2 (67)       |             | 0.62             | 0.70                    |
| AMS                                            | 59 (42)    |              | 5 (4)       | 0.21             | 0.02                    |
| Tie-stall                                      | 53 (50)    |              | 2 (2)       | 0.09             | 0.005                   |
| Parlour                                        | 17 (22)    |              | 7 (9)       | Ref.             |                         |
| Rotary                                         | 0 (0)      |              | 3 (33)      | -                | -                       |
| Combinations                                   | 1 (33)     |              | 0 (0)       | -                | -                       |
| AMS                                            |            | 78 (55)      | 5 (4)       | 0.13             | 0.02                    |
| Tie-stall                                      |            | 50 (48)      | 2 (2)       | 0.08             | 0.01                    |
| Parlour                                        |            | 55 (70)      | 7 (9)       | 0.25             | 0.09                    |

|                         |         |         |         |                   |                       |
|-------------------------|---------|---------|---------|-------------------|-----------------------|
| Rotary                  |         | 6 (67)  | 3 (33)  | Ref.              |                       |
| Combinations            |         | 2 (67)  | 0 (0)   | -                 | -                     |
| Number of cows/herd     |         |         |         |                   | R <sup>2</sup> = 0.08 |
| <53                     | 49 (59) | 34 (39) |         | Ref.              |                       |
| 53-77                   | 35 (42) | 48 (54) |         | 1.97              | 0.03                  |
| 78-137                  | 23 (27) | 62 (73) |         | 3.88              | <0.001                |
| ≥138                    | 21 (25) | 64 (61) |         | 4.39              | <0.001                |
| <53                     | 49 (59) |         | 2 (2)   | 0.07              | 0.001                 |
| 53-77                   | 35 (42) |         | 3 (4)   | 0.15              | 0.007                 |
| 78-137                  | 23 (27) |         | 0 (0)   | -                 | -                     |
| ≥138                    | 21 (25) |         | 12 (14) | Ref.              |                       |
| <53                     |         | 34 (39) | 2 (2)   | 0.27              | 0.10                  |
| 53-77                   |         | 48 (54) | 3 (4)   | 0.29              | 0.07                  |
| 78-137                  |         | 62 (73) | 0 (0)   | -                 | -                     |
| ≥138                    |         | 64 (61) | 12 (14) | Ref.              |                       |
| Region                  |         |         |         |                   | R <sup>2</sup> = 0.04 |
| East Sweden             | 17 (33) | 32 (63) |         | 0.81              | 0.59                  |
| Norrland                | 18 (37) | 28 (57) |         | 0.67              | 0.30                  |
| Northern Middle Sweden  | 15 (50) | 13 (43) |         | 0.37              | 0.03                  |
| Småland and the islands | 35 (49) | 37 (51) |         | 0.46              | 0.02                  |
| South Sweden            | 20 (45) | 23 (52) |         | 0.50              | 0.07                  |
| West Sweden             | 25 (27) | 58 (63) |         | Ref. <sup>1</sup> |                       |
| East Sweden             | 17 (33) |         | 2 (4)   | 0.33              | 0.18                  |
| Norrland                | 18 (37) |         | 3 (6)   | 0.46              | 0.29                  |
| Northern Middle Sweden  | 15 (50) |         | 2 (7)   | 0.37              | 0.24                  |
| Småland and the islands | 35 (49) |         | 0 (0)   | -                 | -                     |
| South Sweden            | 20 (45) |         | 1 (2)   | 0.14              | 0.07                  |
| West Sweden             | 25 (27) |         | 9 (10)  | Ref.              |                       |
| East Sweden             |         | 32 (63) | 2 (4)   | 0.40              | 0.26                  |
| Norrland                |         | 28 (57) | 3 (6)   | 0.69              | 0.60                  |
| Northern Middle Sweden  |         | 13 (43) | 2 (7)   | 0.99              | 0.99                  |
| Småland and the islands |         | 37 (51) | 0 (0)   | -                 | -                     |
| South Sweden            |         | 23 (52) | 1 (2)   | 0.28              | 0.24                  |
| West Sweden             |         | 58 (63) | 9 (10)  | Ref.              |                       |

<sup>1</sup> RRR = relative risk ratio; Ref. = referent; <sup>2</sup> R<sup>2</sup> = coefficient of variation (the proportion of the variation in the dependent variable that is predictable from the independent variable). <sup>3</sup> ECM = energy-corrected milk. <sup>4</sup> AMS = automatic milking system.

| Are these cows milked with prolonged milking interval? | Yes, ≥75% of the cows<br>N (%) | Yes, <75% of the cows<br>N (%) | No<br>N (%) | RRR <sup>1</sup>  | p-value <sup>2</sup>  |
|--------------------------------------------------------|--------------------------------|--------------------------------|-------------|-------------------|-----------------------|
| Region                                                 |                                |                                |             |                   | R <sup>2</sup> = 0.05 |
| East Sweden                                            | 46 (90)                        | 4 (8)                          |             | 0.34              | 0.08                  |
| Norrland                                               | 43 (88)                        | 4 (8)                          |             | 0.36              | 0.10                  |
| Northern Middle Sweden                                 | 25 (83)                        | 3 (10)                         |             | 0.47              | 0.28                  |
| Småland and the islands                                | 47 (65)                        | 12 (17)                        |             | Ref. <sup>1</sup> |                       |
| South Sweden                                           | 34 (77)                        | 2 (5)                          |             | 0.23              | 0.07                  |
| West Sweden                                            | 74 (81)                        | 9 (10)                         |             | 0.48              | 0.12                  |

|                         |         |         |      |      |
|-------------------------|---------|---------|------|------|
| East Sweden             | 46 (90) | 1 (2)   | 0.08 | 0.02 |
| Norrland                | 43 (88) | 2 (4)   | 0.17 | 0.02 |
| Northern Middle Sweden  | 25 (83) | 2 (7)   | 0.29 | 0.12 |
| Småland and the islands | 47 (65) | 13 (18) | Ref. |      |
| South Sweden            | 34 (77) | 8 (18)  | 0.85 | 0.78 |
| West Sweden             | 74 (81) | 8 (9)   | 0.39 | 0.05 |
| East Sweden             | 4 (8)   | 1 (2)   | 0.06 | 0.04 |
| Norrland                | 4 (8)   | 2 (4)   | 0.12 | 0.08 |
| Northern Middle Sweden  | 3 (10)  | 2 (7)   | 0.17 | 0.14 |
| Småland and the islands | 12 (17) | 13 (18) | 0.27 | 0.14 |
| South Sweden            | 2 (5)   | 8 (18)  | Ref. |      |
| West Sweden             | 9 (10)  | 8 (9)   | 0.22 | 0.11 |

<sup>1</sup> RRR = relative risk ratio; Ref. = referent; <sup>2</sup> R<sup>2</sup> = coefficient of variation (the proportion of the variation in the dependent variable that is predictable from the independent variable).

| If ≥75 % of these cows are milked with prolonged milking interval, how often are they milked? | Once per day<br>N (%) | Once every second day<br>N (%) | Other or varying interval<br>N (%) | RRR <sup>1</sup>  | p-value <sup>2</sup>  |
|-----------------------------------------------------------------------------------------------|-----------------------|--------------------------------|------------------------------------|-------------------|-----------------------|
| BMSCC                                                                                         |                       |                                |                                    |                   | R <sup>2</sup> = 0.02 |
| < 200,000                                                                                     | 47 (23)               | 75 (38)                        |                                    | Ref. <sup>1</sup> |                       |
| ≥ 200,000                                                                                     | 26 (25)               | 56 (54)                        |                                    | 1.35              | 0.32                  |
| < 200,000                                                                                     | 47 (23)               |                                | 78 (39)                            | Ref.              |                       |
| ≥ 200,000                                                                                     | 26 (25)               |                                | 21 (20)                            | 0.49              | 0.04                  |
| < 200,000                                                                                     |                       | 75 (38)                        | 78 (39)                            | Ref.              |                       |
| ≥ 200,000                                                                                     |                       | 56 (54)                        | 21 (20)                            | 0.36              | 0.001                 |
| Milking system                                                                                |                       |                                |                                    |                   | R <sup>2</sup> = 0.05 |
| AMS <sup>3</sup>                                                                              | 26 (20)               | 66 (50)                        |                                    | 3.15              | 0.001                 |
| Tie-stall                                                                                     | 36 (38)               | 29 (30)                        |                                    | Ref.              |                       |
| Parlour                                                                                       | 10 (15)               | 29 (43)                        |                                    | 3.60              | 0.004                 |
| Rotary                                                                                        | 0 (0)                 | 9 (100)                        |                                    | -                 | -                     |
| Combinations                                                                                  | 1 (33)                | 0 (0)                          |                                    | -                 | -                     |
| AMS                                                                                           | 26 (20)               |                                | 39 (30)                            | 1.80              | 0.10                  |
| Tie-stall                                                                                     | 36 (38)               |                                | 30 (32)                            | Ref.              |                       |
| Parlour                                                                                       | 10 (15)               |                                | 28 (42)                            | 3.36              | 0.006                 |
| Rotary                                                                                        | 0 (0)                 |                                | 0 (0)                              | -                 | -                     |
| Combinations                                                                                  | 1 (33)                |                                | 2 (67)                             | 2.40              | 0.48                  |
| AMS                                                                                           |                       | 66 (50)                        | 39 (30)                            | 0.57              | 0.09                  |
| Tie-stall                                                                                     |                       | 29 (30)                        | 30 (32)                            | Ref.              |                       |
| Parlour                                                                                       |                       | 29 (43)                        | 28 (42)                            | 0.93              | 0.85                  |
| Rotary                                                                                        |                       | 9 (100)                        | 0 (0)                              | -                 | -                     |
| Combinations                                                                                  |                       | 0 (0)                          | 2 (67)                             | -                 | -                     |
| Number of cows/herd                                                                           |                       |                                |                                    |                   | R <sup>2</sup> = 0.03 |
| <53                                                                                           | 28 (36)               | 20 (26)                        |                                    | Ref.              |                       |
| 53-77                                                                                         | 18 (23)               | 36 (47)                        |                                    | 2.80              | 0.01                  |
| 78-137                                                                                        | 13 (17)               | 35 (47)                        |                                    | 3.77              | 0.002                 |
| ≥138                                                                                          | 13 (17)               | 41 (55)                        |                                    | 4.41              | 0.001                 |

|        |         |         |      |       |
|--------|---------|---------|------|-------|
| <53    | 28 (36) | 29 (38) | Ref. |       |
| 53-77  | 18 (23) | 23 (30) | 1.23 | 0.61  |
| 78-137 | 13 (17) | 27 (36) | 2.00 | 0.11  |
| ≥138   | 13 (17) | 20 (27) | 1.48 | 0.37  |
| <53    | 20 (26) | 29 (38) | Ref. |       |
| 53-77  | 36 (47) | 23 (30) | 0.44 | 0.04  |
| 78-137 | 35 (47) | 27 (36) | 0.53 | 0.10  |
| ≥138   | 41 (55) | 20 (27) | 0.34 | 0.006 |

<sup>1</sup> RRR = relative risk ratio; Ref. = referent; <sup>2</sup> R<sup>2</sup> = coefficient of variation (the proportion of the variation in the dependent variable that is predictable from the independent variable). <sup>3</sup> AMS = automatic milking system.

| If ≥75 % of these cows are milked with prolonged milking interval, for how long are they milked? | 1 week<br>N (%) | 2 weeks<br>N (%) | Other<br>N (%) | RRR <sup>1</sup>  | p-value <sup>2</sup>  |
|--------------------------------------------------------------------------------------------------|-----------------|------------------|----------------|-------------------|-----------------------|
| Milking system                                                                                   |                 |                  |                |                   | R <sup>2</sup> = 0.03 |
| AMS <sup>3</sup>                                                                                 | 85 (65)         | 24 (18)          |                | 0.60              | 0.12                  |
| Tie-stall                                                                                        | 55 (60)         | 26 (28)          |                | Ref. <sup>1</sup> |                       |
| Parlour                                                                                          | 47 (72)         | 6 (9)            |                | 0.26              | 0.008                 |
| Rotary                                                                                           | 7 (78)          | 0 (0)            |                | -                 | -                     |
| Combinations                                                                                     | 1 (33)          | 0 (0)            |                | -                 | -                     |
| AMS                                                                                              | 85 (65)         |                  | 21 (16)        | 1.23              | 0.61                  |
| Tie-stall                                                                                        | 55 (60)         |                  | 11 (12)        | Ref.              |                       |
| Parlour                                                                                          | 47 (72)         |                  | 12 (18)        | 1.28              | 0.60                  |
| Rotary                                                                                           | 7 (78)          |                  | 2 (22)         | 1.43              | 0.68                  |
| Combinations                                                                                     | 1 (33)          |                  | 2 (67)         | 9.98              | 0.07                  |
| AMS                                                                                              |                 | 24 (18)          | 21 (16)        | 2.07              | 0.12                  |
| Tie-stall                                                                                        |                 | 26 (28)          | 11 (12)        | Ref.              |                       |
| Parlour                                                                                          |                 | 6 (9)            | 12 (18)        | 4.73              | 0.01                  |
| Rotary                                                                                           |                 | 0 (0)            | 2 (22)         | -                 | -                     |
| Combinations                                                                                     |                 | 0 (0)            | 2 (67)         | -                 | -                     |

<sup>1</sup> RRR = relative risk ratio; Ref. = referent; <sup>2</sup> R<sup>2</sup> = coefficient of variation (the proportion of the variation in the dependent variable that is predictable from the independent variable). <sup>3</sup> AMS = automatic milking system.

| Do you change the feeding for these cows?      | Yes,<br>for ≥75% of<br>the cows<br>N (%) | Yes,<br>for <75% of<br>the cows<br>N (%) | No<br>N (%) | RRR <sup>1</sup> | p-value <sup>2</sup>  |
|------------------------------------------------|------------------------------------------|------------------------------------------|-------------|------------------|-----------------------|
| Milk production, kg ECM <sup>3</sup> /cow/year |                                          |                                          |             |                  | R <sup>2</sup> = 0.03 |
| <9,000                                         | 31 (77)                                  | 3 (8)                                    |             | 8.90             | 0.06                  |
| 9,000-11,000                                   | 159 (82)                                 | 17 (9)                                   |             | 9.84             | 0.03                  |
| >11,000                                        | 92 (91)                                  | 1 (1)                                    |             | Ref.             |                       |
| <9,000                                         | 31 (77)                                  |                                          | 6 (15)      | 2.22             | 0.17                  |
| 9,000-11,000                                   | 159 (82)                                 |                                          | 18 (9)      | 1.30             | 0.55                  |
| >11,000                                        | 92 (91)                                  |                                          | 8 (8)       | Ref.             |                       |
| <9,000                                         |                                          | 3 (8)                                    | 6 (15)      | 0.25             | 0.28                  |
| 9,000-11,000                                   |                                          | 17 (9)                                   | 18 (9)      | 0.13             | 0.07                  |
| >11,000                                        |                                          | 1 (1)                                    | 8 (8)       | Ref.             |                       |

<sup>1</sup> RRR = relative risk ratio; Ref. = referent; <sup>2</sup> R<sup>2</sup> = coefficient of variation (the proportion of the variation in the dependent variable that is predictable from the independent variable). <sup>3</sup> ECM = energy-corrected milk.

| How is the total amount of roughage changed? | Decreases<br>N (%) | Not<br>changed<br>N (%) | Increases<br>N (%) | Other<br>batch<br>N (%) | RRR <sup>1</sup> | <i>p</i> -value <sup>2</sup> |
|----------------------------------------------|--------------------|-------------------------|--------------------|-------------------------|------------------|------------------------------|
| Milking system                               |                    |                         |                    |                         |                  | R <sup>2</sup> = 0.04        |
| AMS <sup>3</sup>                             | 41 (34)            | 63 (52)                 |                    |                         | 1.89             | 0.07                         |
| Tie-stall                                    | 35 (38)            | 49 (54)                 |                    |                         | 1.72             | 0.14                         |
| Parlour                                      | 27 (40)            | 22 (37)                 |                    |                         | Ref.             |                              |
| Rotary                                       | 2 (25)             | 4 (50)                  |                    |                         | 2.45             | 0.33                         |
| Combinations                                 | 2 (67)             | 0 (0)                   |                    |                         | -                | -                            |
| AMS                                          | 41 (34)            |                         | 5 (4)              |                         | 0.12             | 0.06                         |
| Tie-stall                                    | 35 (38)            |                         | 2 (2)              |                         | 0.06             | 0.02                         |
| Parlour                                      | 27 (40)            |                         | 1 (2)              |                         | 0.04             | 0.02                         |
| Rotary                                       | 2 (25)             |                         | 2 (25)             |                         | Ref.             |                              |
| Combinations                                 | 2 (67)             |                         | 1 (33)             |                         | 0.50             | 0.66                         |
| AMS                                          | 41 (34)            |                         |                    | 13 (11)                 | 0.86             | 0.75                         |
| Tie-stall                                    | 35 (38)            |                         |                    | 5 (5)                   | 0.39             | 0.12                         |
| Parlour                                      | 27 (40)            |                         |                    | 10 (17)                 | Ref.             |                              |
| Rotary                                       | 2 (25)             |                         |                    | 0 (0)                   | -                | -                            |
| Combinations                                 | 2 (67)             |                         |                    | 0 (0)                   | -                | -                            |
| AMS                                          |                    | 63 (52)                 | 5 (4)              |                         | 1.94             | 0.44                         |
| Tie-stall                                    |                    | 49 (54)                 | 2 (2)              |                         | Ref.             |                              |
| Parlour                                      |                    | 22 (37)                 | 1 (2)              |                         | 1.11             | 0.93                         |
| Rotary                                       |                    | 4 (50)                  | 2 (25)             |                         | 12.5             | 0.03                         |
| Combinations                                 |                    | 0 (0)                   | 1 (33)             |                         | -                | -                            |
| AMS                                          |                    | 63 (52)                 |                    | 13 (11)                 | 2.02             | 0.21                         |
| Tie-stall                                    |                    | 49 (54)                 |                    | 5 (5)                   | Ref.             |                              |
| Parlour                                      |                    | 22 (37)                 |                    | 10 (17)                 | 4.45             | 0.01                         |
| Rotary                                       |                    | 4 (50)                  |                    | 0 (0)                   | -                | -                            |
| Combinations                                 |                    | 0 (0)                   |                    | 0 (0)                   | -                | -                            |
| AMS                                          |                    |                         | 5 (4)              | 13 (11)                 | 0.26             | 0.25                         |
| Tie-stall                                    |                    |                         | 2 (2)              | 5 (5)                   | 0.25             | 0.30                         |
| Parlour                                      |                    |                         | 1 (2)              | 10 (17)                 | Ref.             |                              |
| Rotary                                       |                    |                         | 2 (25)             | 0 (0)                   | -                | -                            |
| Combinations                                 |                    |                         | 1 (33)             | 0 (0)                   | -                | -                            |
| Number of cows/herd                          |                    |                         |                    |                         |                  | R <sup>2</sup> = 0.04        |
| <53                                          | 25 (36)            | 40 (57)                 |                    |                         | 3.12             | 0.002                        |
| 53-77                                        | 21 (30)            | 39 (57)                 |                    |                         | 3.63             | 0.001                        |
| 78-137                                       | 19 (27)            | 37 (54)                 |                    |                         | 3.80             | 0.001                        |
| ≥138                                         | 41 (55)            | 21 (28)                 |                    |                         | Ref.             |                              |
| <53                                          | 25 (36)            |                         | 1 (1)              |                         | 0.27             | 0.24                         |
| 53-77                                        | 21 (30)            |                         | 1 (1)              |                         | 0.32             | 0.31                         |
| 78-137                                       | 19 (27)            |                         | 3 (4)              |                         | 1.08             | 0.92                         |
| ≥138                                         | 41 (55)            |                         | 6 (8)              |                         | Ref.             |                              |
| <53                                          | 25 (36)            |                         |                    | 4 (6)                   | 1.09             | 0.90                         |



|                         |         |         |       |         |      |                       |
|-------------------------|---------|---------|-------|---------|------|-----------------------|
| 53-77                   | 21 (30) |         |       | 8 (12)  | 2.60 | 0.11                  |
| 78-137                  | 19 (27) |         |       | 10 (14) | 3.60 | 0.03                  |
| ≥138                    | 41 (55) |         |       | 6 (8)   | Ref. |                       |
| <53                     |         | 40 (57) | 1 (1) |         | 0.09 | 0.03                  |
| 53-77                   |         | 39 (57) | 1 (1) |         | 0.09 | 0.03                  |
| 78-137                  |         | 37 (54) | 3 (4) |         | 0.28 | 0.10                  |
| ≥138                    |         | 21 (28) | 6 (8) |         | Ref. |                       |
| <53                     |         | 40 (57) |       | 4 (6)   | 0.35 | 0.13                  |
| 53-77                   |         | 39 (57) |       | 8 (12)  | 0.72 | 0.58                  |
| 78-137                  |         | 37 (54) |       | 10 (14) | 0.95 | 0.92                  |
| ≥138                    |         | 21 (28) |       | 6 (8)   | Ref. |                       |
| <53                     |         |         | 1 (1) | 4 (6)   | 4.00 | 0.27                  |
| 53-77                   |         |         | 1 (1) | 8 (12)  | 8.00 | 0.09                  |
| 78-137                  |         |         | 3 (4) | 10 (14) | 3.33 | 0.17                  |
| ≥138                    |         |         | 6 (8) | 6 (8)   | Ref. |                       |
| Region                  |         |         |       |         |      | R <sup>2</sup> = 0.05 |
| East Sweden             | 12 (27) | 25 (57) |       |         | 2.87 | 0.01                  |
| Norrland                | 8 (20)  | 28 (70) |       |         | 4.83 | 0.001                 |
| Northern Middle Sweden  | 4 (17)  | 15 (62) |       |         | 5.15 | 0.007                 |
| Småland and the islands | 26 (41) | 29 (45) |       |         | 1.54 | 0.24                  |
| South Sweden            | 17 (50) | 12 (35) |       |         | 0.97 | 0.95                  |
| West Sweden             | 40 (51) | 29 (37) |       |         | Ref. |                       |
| East Sweden             | 12 (27) |         | 2 (5) |         | 6.67 | 0.14                  |
| Norrland                | 8 (20)  |         | 0 (0) |         | -    | -                     |
| Northern Middle Sweden  | 4 (17)  |         | 2 (8) |         | 20.0 | 0.03                  |
| Småland and the islands | 26 (41) |         | 4 (6) |         | 6.15 | 0.11                  |
| South Sweden            | 17 (50) |         | 2 (6) |         | 4.71 | 0.22                  |
| West Sweden             | 40 (51) |         | 1 (1) |         | Ref. |                       |
| East Sweden             | 12 (27) |         |       | 5 (11)  | 2.08 | 0.27                  |
| Norrland                | 8 (20)  |         |       | 4 (10)  | 2.50 | 0.21                  |
| Northern Middle Sweden  | 4 (17)  |         |       | 3 (13)  | 3.75 | 0.12                  |
| Småland and the islands | 26 (41) |         |       | 5 (8)   | 0.96 | 0.95                  |
| South Sweden            | 17 (50) |         |       | 3 (9)   | 0.88 | 0.87                  |
| West Sweden             | 40 (51) |         |       | 8 (10)  | Ref. |                       |
| East Sweden             |         | 25 (57) | 2 (5) |         | 2.32 | 0.50                  |
| Norrland                |         | 28 (70) | 0 (0) |         | -    | -                     |
| Northern Middle Sweden  |         | 15 (62) | 2 (8) |         | 3.87 | 0.29                  |
| Småland and the islands |         | 29 (45) | 4 (6) |         | 4.00 | 0.23                  |
| South Sweden            |         | 12 (35) | 2 (6) |         | 4.83 | 0.22                  |
| West Sweden             |         | 29 (37) | 1 (1) |         | Ref. |                       |
| East Sweden             |         | 25 (57) |       | 5 (11)  | 0.72 | 0.61                  |
| Norrland                |         | 28 (70) |       | 4 (10)  | 0.52 | 0.32                  |
| Northern Middle Sweden  |         | 15 (62) |       | 3 (13)  | 0.72 | 0.67                  |
| Småland and the islands |         | 29 (45) |       | 5 (8)   | 0.62 | 0.45                  |
| South Sweden            |         | 12 (35) |       | 3 (9)   | 0.91 | 0.90                  |
| West Sweden             |         | 29 (37) |       | 8 (10)  | Ref. |                       |

|                         |       |        |      |      |
|-------------------------|-------|--------|------|------|
| East Sweden             | 2 (5) | 5 (11) | 0.31 | 0.39 |
| Norrland                | 0 (0) | 4 (10) | -    | -    |
| Northern Middle Sweden  | 2 (8) | 3 (13) | 0.19 | 0.98 |
| Småland and the islands | 4 (6) | 5 (8)  | 0.16 | 0.23 |
| South Sweden            | 2 (6) | 3 (9)  | 0.19 | 0.14 |
| West Sweden             | 1 (1) | 8 (10) | Ref. | 0.23 |

<sup>1</sup> RRR = relative risk ratio; Ref. = referent; <sup>2</sup> R<sup>2</sup> = coefficient of variation (the proportion of the variation in the dependent variable that is predictable from the independent variable). <sup>3</sup> AMS = automatic milking system.

| How is the total amount of straw changed? | Not changed<br>N (%) | Increases<br>N (%) | OR <sup>1</sup> | p-value <sup>2</sup>  |
|-------------------------------------------|----------------------|--------------------|-----------------|-----------------------|
| Milking system                            |                      |                    |                 | R <sup>2</sup> = 0.02 |
| AMS <sup>3</sup>                          | 39 (38)              | 65 (62)            | 0.49            | 0.06                  |
| Tie-stall                                 | 31 (44)              | 40 (56)            | 0.38            | 0.02                  |
| Parlour                                   | 12 (23)              | 41 (77)            | Ref.            |                       |
| Rotary                                    | 0 (0)                | 8 (100)            | -               | -                     |
| Combinations                              | 0 (0)                | 1 (100)            | -               | -                     |
| Number of cows/herd                       |                      |                    |                 | R <sup>2</sup> = 0.07 |
| <53                                       | 20 (42)              | 28 (58)            | 0.24            | 0.001                 |
| 53-77                                     | 31 (51)              | 30 (49)            | 0.16            | <0.001                |
| 78-137                                    | 20 (34)              | 38 (66)            | 0.32            | 0.01                  |
| ≥138                                      | 10 (14)              | 59 (86)            | Ref.            |                       |
| Region                                    |                      |                    |                 | R <sup>2</sup> = 0.05 |
| East Sweden                               | 14 (36)              | 25 (64)            | 3.57            | 0.02                  |
| Norrland                                  | 16 (67)              | 8 (33)             | Ref.            |                       |
| Northern Middle Sweden                    | 7 (44)               | 9 (56)             | 2.57            | 0.16                  |
| Småland and the islands                   | 20 (34)              | 39 (66)            | 3.90            | 0.008                 |
| South Sweden                              | 9 (27)               | 24 (73)            | 5.33            | 0.004                 |
| West Sweden                               | 16 (24)              | 50 (76)            | 6.25            | <0.001                |

<sup>1</sup> OR = odds ratio; Ref. = referent; <sup>2</sup> R<sup>2</sup> = coefficient of variation (the proportion of the variation in the dependent variable that is predictable from the independent variable). <sup>3</sup> AMS = automatic milking system.

| How is the total amount of hay changed? | Decreases<br>N (%) | Not<br>changed<br>N (%) | Increases<br>N (%) | Other<br>batch<br>N (%) | RRR <sup>1</sup> | p-value <sup>2</sup>  |
|-----------------------------------------|--------------------|-------------------------|--------------------|-------------------------|------------------|-----------------------|
| Number of cows/herd                     |                    |                         |                    |                         |                  | R <sup>2</sup> = 0.05 |
| <53                                     | 8 (14)             | 30 (54)                 |                    |                         | 2.34             | 0.13                  |
| 53-77                                   | 7 (12)             | 36 (61)                 |                    |                         | 3.21             | 0.04                  |
| 78-137                                  | 5 (10)             | 35 (70)                 |                    |                         | 4.38             | 0.02                  |
| ≥138                                    | 10 (18)            | 16 (29)                 |                    |                         | Ref              |                       |
| <53                                     | 8 (14)             |                         | 14 (25)            |                         | 1.46             | 0.54                  |
| 53-77                                   | 7 (12)             |                         | 8 (14)             |                         | 0.95             | 0.94                  |
| 78-137                                  | 5 (10)             |                         | 4 (8)              |                         | 0.67             | 0.61                  |
| ≥138                                    | 10 (18)            |                         | 12 (22)            |                         | Ref              |                       |
| <53                                     | 8 (14)             |                         |                    | 4 (7)                   | 0.29             | 0.09                  |
| 53-77                                   | 7 (12)             |                         |                    | 8 (14)                  | 0.67             | 0.54                  |
| 78-137                                  | 5 (10)             |                         |                    | 6 (12)                  | 0.71             | 0.63                  |
| ≥138                                    | 10 (18)            |                         |                    | 17 (31)                 | Ref              |                       |
| <53                                     |                    | 30 (54)                 | 14 (25)            |                         | 0.62             | 0.34                  |
| 53-77                                   |                    | 36 (61)                 | 8 (14)             |                         | 0.30             | 0.03                  |

|        |         |         |         |       |
|--------|---------|---------|---------|-------|
| 78-137 | 35 (70) | 4 (8)   | 0.15    | 0.004 |
| ≥138   | 16 (29) | 12 (22) | Ref     |       |
| <53    | 30 (54) | 4 (7)   | 0.12    | 0.001 |
| 53-77  | 36 (61) | 8 (14)  | 0.21    | 0.003 |
| 78-137 | 35 (70) | 6 (12)  | 0.16    | 0.001 |
| ≥138   | 16 (29) | 17 (31) | Ref     |       |
| <53    |         | 14 (25) | 4 (7)   | Ref   |
| 53-77  |         | 8 (14)  | 8 (14)  | 3.50  |
| 78-137 |         | 4 (8)   | 6 (12)  | 5.25  |
| ≥138   |         | 12 (22) | 17 (31) | 4.96  |

<sup>1</sup> RRR = relative risk ratio; Ref. = referent. <sup>2</sup> R<sup>2</sup> = coefficient of variation (the proportion of the variation in the dependent variable that is predictable from the independent variable).

| How is the total amount of silage changed (if the herd changes feeding for ≥75% of these cows)? | Decreases<br>N (%) | Not<br>changed<br>N (%) | OR <sup>1</sup> | <i>p</i> -value <sup>2</sup> |
|-------------------------------------------------------------------------------------------------|--------------------|-------------------------|-----------------|------------------------------|
| Number of cows/herd                                                                             |                    |                         |                 | R <sup>2</sup> = 0.03        |
| <53                                                                                             | 41 (14)            | 23 (36)                 | 1.96            | 0.41                         |
| 53-77                                                                                           | 30 (51)            | 29 (49)                 | 3.38            | 0.002                        |
| 78-137                                                                                          | 34 (63)            | 20 (37)                 | 2.06            | 0.08                         |
| ≥138                                                                                            | 49 (78)            | 14 (22)                 | Ref.            |                              |
| Region                                                                                          |                    |                         |                 | R <sup>2</sup> = 0.04        |
| East Sweden                                                                                     | 23 (61)            | 15 (39)                 | 2.51            | 0.04                         |
| Norrland                                                                                        | 15 (45)            | 18 (55)                 | 4.61            | 0.001                        |
| Northern Middle Sweden                                                                          | 12 (56)            | 10 (45)                 | 3.20            | 0.03                         |
| Småland and the islands                                                                         | 37 (64)            | 21 (36)                 | 2.18            | 0.06                         |
| South Sweden                                                                                    | 18 (64)            | 10 (36)                 | 2.14            | 0.13                         |
| West Sweden                                                                                     | 50 (79)            | 13 (21)                 | Ref.            |                              |

<sup>1</sup> OR = odds ratio; Ref. = referent; <sup>2</sup> R<sup>2</sup> = coefficient of variation (the proportion of the variation in the dependent variable that is predictable from the independent variable).

| How is the total amount of other feeds changed? | Decreases<br>N (%) | Not<br>changed<br>N (%) | Increases<br>N (%) | Other<br>batch<br>N (%) | RRR <sup>1</sup> | <i>p</i> -value <sup>2</sup> |
|-------------------------------------------------|--------------------|-------------------------|--------------------|-------------------------|------------------|------------------------------|
| Number of cows/herd                             |                    |                         |                    |                         |                  | R <sup>2</sup> = 0.08        |
| <53                                             | 16 (30)            | 26 (49)                 |                    |                         | 2.67             | 0.04                         |
| 53-77                                           | 6 (13)             | 34 (76)                 |                    |                         | 9.31             | <0.001                       |
| 78-137                                          | 8 (17)             | 33 (70)                 |                    |                         | 6.78             | <0.001                       |
| ≥138                                            | 23 (45)            | 14 (27)                 |                    |                         | Ref              |                              |
| <53                                             | 16 (30)            |                         | 2 (4)              |                         | 0.57             | 0.54                         |
| 53-77                                           | 6 (13)             |                         | 3 (7)              |                         | 2.30             | 0.33                         |
| 78-137                                          | 8 (17)             |                         | 1 (2)              |                         | 0.67             | 0.64                         |
| ≥138                                            | 23 (45)            |                         | 5 (10)             |                         | Ref              |                              |
| <53                                             | 16 (30)            |                         |                    | 9 (17)                  | 1.44             | 0.53                         |
| 53-77                                           | 6 (13)             |                         |                    | 2 (4)                   | 0.85             | 0.86                         |
| 78-137                                          | 8 (17)             |                         |                    | 5 (11)                  | 1.60             | 0.50                         |
| ≥138                                            | 23 (45)            |                         |                    | 9 (18)                  | Ref              |                              |
| <53                                             |                    | 26 (49)                 | 2 (4)              |                         | 0.21             | 0.09                         |
| 53-77                                           |                    | 34 (76)                 | 3 (7)              |                         | 0.25             | 0.08                         |

|        |         |        |        |      |       |
|--------|---------|--------|--------|------|-------|
| 78-137 | 33 (70) | 1 (2)  |        | 0.08 | 0.03  |
| ≥138   | 14 (27) | 5 (10) |        | Ref  |       |
| <53    | 26 (49) |        | 9 (17) | 0.54 | 0.28  |
| 53-77  | 34 (76) |        | 2 (4)  | 0.09 | 0.005 |
| 78-137 | 33 (70) |        | 5 (11) | 0.24 | 0.02  |
| ≥138   | 14 (27) |        | 9 (18) | Ref  |       |
| <53    |         | 2 (4)  | 9 (17) | 2.50 | 0.34  |
| 53-77  |         | 3 (7)  | 2 (4)  | 0.37 | 0.35  |
| 78-137 |         | 1 (2)  | 5 (11) | 2.78 | 0.41  |
| ≥138   |         | 5 (10) | 9 (18) | Ref  |       |

<sup>1</sup> RRR = relative risk ratio; Ref. = referent. <sup>2</sup> R<sup>2</sup> = coefficient of variation (the proportion of the variation in the dependent variable that is predictable from the independent variable).

| Do these cows stay in the lactating group?       | Yes,<br>≥75% of<br>the cows<br>N (%) | Yes,<br><75% of<br>the cows<br>N (%) | No<br>N (%) | RRR <sup>1</sup> | p-value <sup>2</sup>  |
|--------------------------------------------------|--------------------------------------|--------------------------------------|-------------|------------------|-----------------------|
| Milk production, kg ECM <sup>3,4</sup> /cow/year |                                      |                                      |             |                  | R <sup>2</sup> = 0.04 |
| <9,000                                           | 24 (63)                              |                                      | 7 (18)      | Ref.             |                       |
| 9,000-11,000                                     | 69 (36)                              |                                      | 95 (49)     | 0.21             | 0.001                 |
| >11,000                                          | 35 (35)                              |                                      | 61 (60)     | 0.16             | <0.001                |
| <9,000                                           |                                      | 7 (18)                               | 7 (18)      | Ref.             |                       |
| 9,000-11,000                                     |                                      | 29 (15)                              | 95 (49)     | 0.30             | 0.04                  |
| >11,000                                          |                                      | 5 (5)                                | 61 (60)     | 0.08             | <0.001                |
| <9,000                                           | 24 (63)                              | 7 (18)                               |             | 2.04             | 0.27                  |
| 9,000-11,000                                     | 69 (36)                              | 29 (15)                              |             | 2.94             | 0.04                  |
| >11,000                                          | 35 (35)                              | 5 (5)                                |             | Ref.             |                       |
| Milking system                                   |                                      |                                      |             |                  | R <sup>2</sup> = 0.05 |
| AMS <sup>5</sup>                                 | 55 (39)                              |                                      | 74 (52)     | 0.47             | 0.009                 |
| Tie-stall                                        | 49 (48)                              |                                      | 31 (31)     | Ref.             |                       |
| Parlour                                          | 22 (28)                              |                                      | 50 (63)     | 0.28             | <0.001                |
| Rotary                                           | 1 (11)                               |                                      | 8 (89)      | 0.08             | 0.02                  |
| Combinations                                     | 1 (33)                               |                                      | 2 (67)      | 0.32             | 0.36                  |
| AMS                                              |                                      | 13 (9)                               | 74 (52)     | 0.26             | 0.001                 |
| Tie-stall                                        |                                      | 21 (21)                              | 31 (31)     | Ref.             |                       |
| Parlour                                          |                                      | 7 (9)                                | 50 (63)     | 0.21             | 0.001                 |
| Rotary                                           |                                      | 0 (0)                                | 8 (89)      | -                | -                     |
| Combinations                                     |                                      | 0 (0)                                | 2 (67)      | -                | -                     |
| AMS                                              | 55 (39)                              | 13 (9)                               |             | 0.55             | 0.14                  |
| Tie-stall                                        | 49 (48)                              | 21 (21)                              |             | Ref.             |                       |
| Parlour                                          | 22 (28)                              | 7 (9)                                |             | 0.74             | 0.56                  |
| Rotary                                           | 1 (11)                               | 0 (0)                                |             | -                | -                     |
| Combinations                                     | 1 (33)                               | 0 (0)                                |             | -                | -                     |
| Number of cows/herd                              |                                      |                                      |             |                  | R <sup>2</sup> = 0.09 |
| <53                                              | 46 (57)                              |                                      | 19 (24)     | 9.40             | <0.001                |
| 53-77                                            | 37 (45)                              |                                      | 34 (41)     | 4.22             | <0.001                |
| 78-137                                           | 27 (32)                              |                                      | 46 (54)     | 2.28             | 0.02                  |
| ≥138                                             | 17 (20)                              |                                      | 66 (78)     | Ref.             |                       |

|                         |         |         |         |      |                       |
|-------------------------|---------|---------|---------|------|-----------------------|
| <53                     |         | 15 (19) | 19 (24) | 26.0 | <0.001                |
| 53-77                   |         | 12 (14) | 34 (41) | 11.6 | 0.002                 |
| 78-137                  |         | 12 (14) | 46 (54) | 8.61 | 0.006                 |
| ≥138                    |         | 2 (2)   | 66 (78) | Ref. |                       |
| <53                     | 46 (57) | 15 (19) |         | 2.77 | 0.21                  |
| 53-77                   | 37 (45) | 12 (14) |         | 2.76 | 0.22                  |
| 78-137                  | 27 (32) | 12 (14) |         | 3.78 | 0.11                  |
| ≥138                    | 17 (20) | 2 (2)   |         | Ref. |                       |
| Region <sup>6</sup>     |         |         |         |      | R <sup>2</sup> = 0.03 |
| East Sweden             | 21 (41) |         | 25 (49) | 0.50 | 0.11                  |
| Norrland                | 27 (57) |         | 16 (34) | Ref. |                       |
| Northern Middle Sweden  | 15 (50) |         | 9 (30)  | 0.99 | 0.98                  |
| Småland and the islands | 24 (33) |         | 37 (51) | 0.38 | 0.02                  |
| South Sweden            | 13 (30) |         | 24 (54) | 0.32 | 0.02                  |
| West Sweden             | 28 (31) |         | 54 (60) | 0.31 | 0.003                 |
| East Sweden             |         | 5 (10)  | 25 (49) | 0.30 | 0.09                  |
| Norrland                |         | 4 (8)   | 16 (34) | 0.37 | 0.20                  |
| Northern Middle Sweden  |         | 6 (20)  | 9 (30)  | Ref. |                       |
| Småland and the islands |         | 11 (15) | 37 (51) | 0.45 | 0.20                  |
| South Sweden            |         | 7 (16)  | 24 (54) | 0.44 | 0.22                  |
| West Sweden             |         | 8 (9)   | 54 (60) | 0.22 | 0.02                  |
| East Sweden             | 21 (41) | 5 (10)  |         | 0.44 | 0.23                  |
| Norrland                | 27 (57) | 4 (8)   |         | 0.27 | 0.07                  |
| Northern Middle Sweden  | 15 (50) | 6 (20)  |         | 0.74 | 0.66                  |
| Småland and the islands | 24 (33) | 11 (15) |         | 0.85 | 0.79                  |
| South Sweden            | 13 (30) | 7 (16)  |         | Ref. |                       |
| West Sweden             | 28 (31) | 8 (9)   |         | 0.53 | 0.30                  |

<sup>1</sup> RRR = relative risk ratio; Ref. = referent; <sup>2</sup> R<sup>2</sup> = coefficient of variation (the proportion of the variation in the dependent variable that is predictable from the independent variable). <sup>3</sup> ECM = energy-corrected milk. <sup>4</sup> In addition, more herds producing 9 000 to 11 000 kg ECM than herds producing >11 000 kg ECM sometimes let the cows stay in the lactating group. <sup>5</sup> AMS = automatic milking system. <sup>6</sup> In addition, more herds in Northern Middle Sweden than in South (RRR = 0.32,  $p = 0.04$ ) and West Sweden (RRR = 0.31,  $p = 0.02$ ) always let their cows stay in the lactating group during drying off.

| Are ≥75% of these cows teat dipped/sprayed? | Yes<br>N (%) | No<br>N (%) | OR <sup>1</sup> | $p$ -value <sup>2</sup> |
|---------------------------------------------|--------------|-------------|-----------------|-------------------------|
| Region                                      |              |             |                 | R <sup>2</sup> = 0.04   |
| East Sweden                                 | 41 (80)      | 10 (20)     | 0.58            | 0.26                    |
| Norrland                                    | 42 (86)      | 7 (14)      | 0.40            | 0.08                    |
| Northern Middle Sweden                      | 28 (93)      | 2 (7)       | 0.17            | 0.03                    |
| Småland and the islands                     | 52 (72)      | 20 (28)     | 0.92            | 0.84                    |
| South Sweden                                | 31 (70)      | 13 (30)     | Ref.            |                         |
| West Sweden                                 | 79 (86)      | 13 (14)     | 0.39            | 0.04                    |

<sup>1</sup> OR = odds ratio; Ref. = referent; <sup>2</sup> R<sup>2</sup> = coefficient of variation (the proportion of the variation in the dependent variable that is predictable from the independent variable).

| Is the udder of ≥75% of these cows controlled? | Yes<br>N (%) | No<br>N (%) | OR <sup>1</sup> | $p$ -value <sup>2</sup> |
|------------------------------------------------|--------------|-------------|-----------------|-------------------------|
| Milk production kg ECM <sup>3</sup> /cow/year  |              |             |                 | R <sup>2</sup> = 0.03   |
| <9,000                                         | 16 (40)      | 24 (60)     | Ref.            |                         |

|              |          |         |      |       |
|--------------|----------|---------|------|-------|
| 9,000-11,000 | 123 (63) | 72 (37) | 0.39 | 0.008 |
| >11,000      | 72 (71)  | 29 (39) | 0.27 | 0.001 |

<sup>1</sup> OR = odds ratio; Ref. = referent; <sup>2</sup> R<sup>2</sup> = coefficient of variation (the proportion of the variation in the dependent variable that is predictable from the independent variable). <sup>3</sup> ECM = energy-corrected milk.

| Is the udder controlled by visual inspection? | Yes<br>N (%) | No<br>N (%) | OR <sup>1</sup> | <i>p</i> -value <sup>2</sup> |
|-----------------------------------------------|--------------|-------------|-----------------|------------------------------|
| Region                                        |              |             |                 | R <sup>2</sup> = 0.06        |
| East Sweden                                   | 28 (85)      | 5 (15)      | 7.70            | 0.002                        |
| Norrland                                      | 24 (71)      | 10 (29)     | 3.30            | 0.05                         |
| Northern Middle Sweden                        | 8 (42)       | 11 (58)     | Ref.            |                              |
| Småland and the islands                       | 29 (67)      | 14 (33)     | 2.85            | 0.06                         |
| South Sweden                                  | 23 (82)      | 5 (18)      | 6.32            | 0.007                        |
| West Sweden                                   | 45 (82)      | 10 (18)     | 6.19            | 0.002                        |

<sup>1</sup> OR = odds ratio; Ref. = referent; <sup>2</sup> R<sup>2</sup> = coefficient of variation (the proportion of the variation in the dependent variable that is predictable from the independent variable).

| Is the udder controlled by palpation? | Yes<br>N (%) | No<br>N (%) | OR <sup>1</sup> | <i>p</i> -value <sup>2</sup> |
|---------------------------------------|--------------|-------------|-----------------|------------------------------|
| Milking system                        |              |             |                 | R <sup>2</sup> = 0.08        |
| AMS <sup>3</sup>                      | 74 (85)      | 13 (15)     | 0.08            | 0.02                         |
| Tie-stall                             | 67 (99)      | 1 (1)       | Ref.            |                              |
| Parlour                               | 43 (86)      | 7 (14)      | 0.09            | 0.03                         |
| Rotary                                | 6 (86)       | 1 (14)      | 0.09            | 0.10                         |

<sup>1</sup> OR = odds ratio; Ref. = referent; <sup>2</sup> R<sup>2</sup> = coefficient of variation (the proportion of the variation in the dependent variable that is predictable from the independent variable). <sup>3</sup> AMS = automatic milking system.

**Supplementary Table S3.** Significant associations between veterinary variables and responses to questions about giving advice to farmers and personnel regarding drying-off of dairy cows given by veterinarians ( $n = 130$ ) participating in a web-based questionnaire as analysed using univariable logistic or multinomial logistic regression models

| Do you give advice about drying-off? | Yes<br>N (%) | No<br>N (%) | OR <sup>1</sup> | $p$ -value <sup>2</sup> |
|--------------------------------------|--------------|-------------|-----------------|-------------------------|
| Mastitis cases/month                 |              |             |                 | $R^2 = 0.08$            |
| <1                                   | 8 (47)       | 9 (53)      | 9.00            | 0.005                   |
| 1-3                                  | 19 (63)      | 11 (37)     | 4.63            | 0.03                    |
| 4-8                                  | 30 (75)      | 10 (25)     | 2.67            | 0.17                    |
| 9-15                                 | 24 (89)      | 3 (11)      | Ref.            |                         |
| >15                                  | 16 (100)     | 0 (0)       | -               | -                       |
| Post-graduate training               |              |             |                 | $R^2 = 0.15$            |
| Yes                                  | 69 (90)      | 8 (10)      | Ref.            |                         |
| No                                   | 28 (54)      | 24 (46)     | 7.39            | <0.001                  |
| Region                               |              |             |                 | $R^2 = 0.09$            |
| East Sweden                          | 19 (58)      | 14 (42)     | Ref.            |                         |
| Norrland                             | 20 (87)      | 3 (13)      | 0.20            | 0.03                    |
| Northern Middle Sweden               | 11 (61)      | 7 (39)      | 0.86            | 0.81                    |
| Småland and the islands              | 15 (83)      | 3 (17)      | 0.27            | 0.07                    |
| South Sweden                         | 14 (93)      | 1 (7)       | 0.10            | 0.03                    |
| West Sweden                          | 18 (78)      | 5 (22)      | 0.38            | 0.11                    |
| Year of degree <sup>3</sup>          |              |             |                 | $R^2 = 0.11$            |
| 1977-1991                            | 25 (96)      | 1 (4)       | Ref.            |                         |
| 1992-2001                            | 20 (77)      | 6 (23)      | 7.50            | 0.07                    |
| 2002-2008                            | 20 (83)      | 4 (17)      | 5.00            | 0.16                    |
| 2009-2014                            | 16 (64)      | 9 (36)      | 14.1            | 0.02                    |
| 2015-2020                            | 16 (55)      | 13 (45)     | 20.3            | 0.006                   |

<sup>1</sup> OR = odds ratio; Ref. = referent. <sup>2</sup>  $R^2$  = coefficient of variation (the proportion of the variation in the dependent variable that is predictable from the independent variable). <sup>3</sup> In addition, a larger proportion among those with an exam from 2002-2008 compared to 2015-2020 stated that they give advice (OR = 1.40,  $p = 0.03$ ).

| Do you think removing these cows from the lactating group is important? | Yes, very<br>N (%) | Yes, rather<br>N (%) | No<br>N (%) | Don't know<br>N (%) | RRR <sup>1</sup> | $p$ -value <sup>2</sup> |
|-------------------------------------------------------------------------|--------------------|----------------------|-------------|---------------------|------------------|-------------------------|
| Mastitis cases/month <sup>3</sup>                                       |                    |                      |             |                     |                  | $R^2 = 0.11$            |
| <1                                                                      | 2 (12)             | 11 (69)              |             |                     | Ref.             |                         |
| 1-3                                                                     | 20 (67)            | 7 (23)               |             |                     | 0.06             | 0.002                   |
| 4-8                                                                     | 21 (54)            | 13 (33)              |             |                     | 0.11             | 0.01                    |
| 9-15                                                                    | 11 (41)            | 13 (48)              |             |                     | 0.21             | 0.08                    |
| >15                                                                     | 12 (75)            | 1 (6)                |             |                     | 0.02             | 0.001                   |
| <1                                                                      | 2 (12)             |                      | 2 (12)      |                     | Ref.             |                         |
| 1-3                                                                     | 20 (67)            |                      | 0 (0)       |                     | -                | -                       |
| 4-8                                                                     | 21 (54)            |                      | 1 (3)       |                     | 0.05             | 0.03                    |
| 9-15                                                                    | 11 (41)            |                      | 0 (0)       |                     | -                | -                       |
| >15                                                                     | 12 (75)            |                      | 1 (6)       |                     | 0.08             | 0.09                    |
| <1                                                                      | 2 (12)             |                      |             | 1 (6)               | Ref.             |                         |
| 1-3                                                                     | 20 (67)            |                      |             | 3 (10)              | 0.30             | 0.38                    |
| 4-8                                                                     | 21 (54)            |                      |             | 4 (10)              | 0.38             | 0.47                    |
| 9-15                                                                    | 11 (41)            |                      |             | 3 (11)              | 0.54             | 0.66                    |

|      |         |         |        |        |      |
|------|---------|---------|--------|--------|------|
| >15  | 12 (75) |         | 2 (12) | 0.33   | 0.45 |
| <1   |         | 11 (69) | 2 (12) | Ref.   |      |
| 1-3  |         | 7 (23)  | 0 (0)  | -      | -    |
| 4-8  |         | 13 (33) | 1 (3)  | 0.42   | 0.51 |
| 9-15 |         | 13 (48) | 0 (0)  | -      | -    |
| >15  |         | 1 (6)   | 1 (6)  | 5.50   | 0.29 |
| <1   |         | 11 (69) | 1 (6)  | Ref.   |      |
| 1-3  |         | 7 (23)  | 3 (10) | 4.71   | 0.22 |
| 4-8  |         | 13 (33) | 4 (10) | 3.38   | 0.31 |
| 9-15 |         | 13 (48) | 3 (11) | 2.54   | 0.45 |
| >15  |         | 1 (6)   | 2 (12) | 22.0   | 0.06 |
| <1   |         |         | 2 (12) | 1 (6)  | Ref. |
| 1-3  |         |         | 0 (0)  | 3 (10) | -    |
| 4-8  |         |         | 1 (3)  | 4 (10) | 8.00 |
| 9-15 |         |         | 0 (0)  | 3 (11) | -    |
| >15  |         |         | 1 (6)  | 2 (12) | 4.00 |

<sup>1</sup> RRR = relative risk ratio; Ref. = referent. <sup>2</sup> R<sup>2</sup> = coefficient of variation (the proportion of the variation in the dependent variable that is predictable from the independent variable). <sup>3</sup> In addition, a larger proportion of veterinarians who treated 1-3 (RRR = 3.38,  $p = 0.04$ ) or >15 (RRR = 14.2,  $p = 0.02$ ) mastitis cases/month stated that they think moving cows is very important compared to those who treated 9-15 cases/month.

| Do you recommend abrupt cessation of milking? | Yes, always<br>N (%) | Yes, under<br>certain<br>conditions<br>N (%) | No<br>N (%) | RRR <sup>1</sup> | $p$ -value <sup>2</sup> |
|-----------------------------------------------|----------------------|----------------------------------------------|-------------|------------------|-------------------------|
| Mastitis cases/month <sup>3</sup>             |                      |                                              |             |                  | R <sup>2</sup> = 0.08   |
| <1                                            |                      | 2 (12)                                       | 14 (82)     | Ref.             |                         |
| 1-3                                           |                      | 7 (24)                                       | 21 (72)     | 2.33             | 0.33                    |
| 4-8                                           |                      | 20 (50)                                      | 20 (50)     | 7.00             | 0.02                    |
| 9-15                                          |                      | 11 (42)                                      | 15 (58)     | 5.13             | 0.06                    |
| >15                                           |                      | 8 (50)                                       | 8 (50)      | 7.00             | 0.03                    |
| <1                                            | 1 (6)                |                                              | 14 (82)     | Ref.             |                         |
| 1-3                                           | 1 (3)                |                                              | 21 (72)     | 0.67             | 0.78                    |
| 4-8                                           | 0 (0)                |                                              | 20 (50)     | -                | -                       |
| 9-15                                          | 0 (0)                |                                              | 15 (58)     | -                | -                       |
| >15                                           | 0 (0)                |                                              | 8 (50)      | -                | -                       |
| <1                                            | 1 (6)                | 2 (12)                                       |             | Ref.             | -                       |
| 1-3                                           | 1 (3)                | 7 (24)                                       |             | 0.28             | 0.44                    |
| 4-8                                           | 0 (0)                | 20 (50)                                      |             | -                | -                       |
| 9-15                                          | 0 (0)                | 11 (42)                                      |             | -                | -                       |
| >15                                           | 0 (0)                | 8 (50)                                       |             | -                | -                       |
| Post-graduate training                        |                      |                                              |             |                  | R <sup>2</sup> = 0.05   |
| Yes                                           |                      | 37 (48)                                      | 39 (51)     | Ref.             |                         |
| No                                            |                      | 11 (22)                                      | 38 (76)     | 0.30             | 0.004                   |
| Yes                                           | 1 (1)                |                                              | 39 (51)     | Ref.             |                         |
| No                                            | 1 (2)                |                                              | 38 (76)     | 1.03             | 0.99                    |



|                         |       |         |         |                       |
|-------------------------|-------|---------|---------|-----------------------|
| Yes                     | 1 (1) | 37 (48) | Ref.    |                       |
| No                      | 1 (2) | 11 (22) | 3.36    | 0.41                  |
| Region <sup>4</sup>     |       |         |         | R <sup>2</sup> = 0.13 |
| East Sweden             |       | 10 (30) | 23 (70) | 0.20                  |
| Norrland                |       | 7 (30)  | 15 (65) | 0.21                  |
| Northern Middle Sweden  |       | 1 (6)   | 16 (94) | 0.03                  |
| Småland and the islands |       | 11 (65) | 5 (29)  | Ref.                  |
| South Sweden            |       | 9 (60)  | 6 (40)  | 0.68                  |
| West Sweden             |       | 10 (43) | 13 (57) | 0.35                  |
| East Sweden             | 0 (0) |         | 23 (70) | -                     |
| Norrland                | 1 (4) |         | 15 (65) | 0.33                  |
| Northern Middle Sweden  | 0 (0) |         | 16 (94) | -                     |
| Småland and the islands | 1 (6) |         | 5 (29)  | Ref.                  |
| South Sweden            | 0 (0) |         | 6 (40)  | -                     |
| West Sweden             | 0 (0) |         | 13 (57) | -                     |
| East Sweden             | 0 (0) | 10 (30) |         | -                     |
| Norrland                | 1 (4) | 7 (30)  |         | 1.57                  |
| Northern Middle Sweden  | 0 (0) | 1 (6)   |         | -                     |
| Småland and the islands | 1 (6) | 11 (65) |         | Ref.                  |
| South Sweden            | 0 (0) | 9 (60)  |         | -                     |
| West Sweden             | 0 (0) | 10 (43) |         | -                     |

<sup>1</sup> RRR = relative risk ratio; Ref. = referent. <sup>2</sup> R<sup>2</sup> = coefficient of variation (the proportion of the variation in the dependent variable that is predictable from the independent variable). <sup>3</sup> In addition, a larger proportion of veterinarians from South Sweden (RRR = 24.0,  $p = 0.006$ ) or West Sweden (RRR = 12.3,  $p = 0.02$ ), than in Northern Middle Sweden, stated that they recommend abrupt cessation under certain conditions. <sup>4</sup> In addition, a larger proportion among those treating 4-8 cases /month (RRR = 3.00,  $p = 0.04$ ) stated that they recommend cessation under certain conditions than among those treating 1-3 cases/month.

| Do you recommend prolonged milking intervals? | Yes, always<br>N (%) | Yes, under<br>certain<br>conditions<br>N (%) | No<br>N (%) | RRR <sup>1</sup> | $p$ -value <sup>2</sup> |
|-----------------------------------------------|----------------------|----------------------------------------------|-------------|------------------|-------------------------|
| Mastitis cases/month                          |                      |                                              |             |                  | R <sup>2</sup> = 0.12   |
| <1                                            |                      | 5 (29)                                       | 6 (35)      | Ref.             |                         |
| 1-3                                           |                      | 9 (32)                                       | 1 (4)       | 10.8             | 0.05                    |
| 4-8                                           |                      | 15 (38)                                      | 4 (10)      | 4.50             | 0.07                    |
| 9-15                                          |                      | 13 (50)                                      | 0 (0)       | -                | -                       |
| >15                                           |                      | 13 (81)                                      | 0 (0)       | -                | -                       |
| <1                                            | 6 (35)               |                                              | 6 (35)      | Ref.             |                         |
| 1-3                                           | 18 (64)              |                                              | 1 (4)       | 18.0             | 0.01                    |
| 4-8                                           | 21 (52)              |                                              | 4 (10)      | 5.25             | 0.04                    |
| 9-15                                          | 13 (50)              |                                              | 0 (0)       | -                | -                       |
| >15                                           | 2 (19)               |                                              | 0 (0)       | -                | -                       |
| <1                                            | 6 (35)               | 5 (29)                                       |             | 5.20             | 0.06                    |
| 1-3                                           | 18 (64)              | 9 (32)                                       |             | 8.67             | 0.004                   |
| 4-8                                           | 21 (52)              | 15 (38)                                      |             | 6.07             | 0.01                    |
| 9-15                                          | 13 (50)              | 13 (50)                                      |             | 4.33             | 0.05                    |
| >15                                           | 2 (19)               | 13 (81)                                      |             | Ref.             |                         |
| Post-graduate training                        |                      |                                              |             |                  | R <sup>2</sup> = 0.06   |
| Yes                                           |                      | 33 (43)                                      | 1 (1)       | Ref.             |                         |

|                         |         |         |        |      |                       |
|-------------------------|---------|---------|--------|------|-----------------------|
| No                      |         | 22 (45) | 9 (18) | 0.07 | 0.02                  |
| Yes                     | 43 (56) |         | 1 (1)  | Ref. |                       |
| No                      | 18 (37) |         | 9 (18) | 0.05 | 0.005                 |
| Yes                     | 43 (56) | 33 (43) |        | Ref. |                       |
| No                      | 18 (37) | 22 (45) |        | 0.03 | 0.24                  |
| Region                  |         |         |        |      | R <sup>2</sup> = 0.09 |
| East Sweden             |         | 13 (40) | 4 (12) | 6.50 | 0.17                  |
| Norrland                |         | 11 (48) | 2 (9)  | 11.0 | 0.10                  |
| Northern Middle Sweden  |         | 1 (6)   | 2 (12) | Ref. |                       |
| Småland and the islands |         | 10 (59) | 0 (0)  | -    | -                     |
| South Sweden            |         | 8 (57)  | 0 (0)  | -    | -                     |
| West Sweden             |         | 12 (52) | 2 (13) | 8.00 | 0.13                  |
| East Sweden             | 16 (48) |         | 4 (12) | 0.57 | 0.55                  |
| Norrland                | 10 (43) |         | 2 (9)  | 0.71 | 0.77                  |
| Northern Middle Sweden  | 14 (82) |         | 2 (12) | Ref. |                       |
| Småland and the islands | 7 (41)  |         | 0 (0)  | -    | -                     |
| South Sweden            | 6 (43)  |         | 0 (0)  | -    | -                     |
| West Sweden             | 8 (35)  |         | 2 (13) | 0.38 | 0.34                  |
| East Sweden             | 16 (48) | 13 (40) |        | 0.09 | 0.03                  |
| Norrland                | 10 (43) | 11 (48) |        | 0.06 | 0.02                  |
| Northern Middle Sweden  | 14 (82) | 1 (6)   |        | Ref. |                       |
| Småland and the islands | 7 (41)  | 10 (59) |        | 0.05 | 0.009                 |
| South Sweden            | 6 (43)  | 8 (57)  |        | 0.05 | 0.01                  |
| West Sweden             | 8 (35)  | 12 (52) |        | 0.05 | 0.007                 |

<sup>1</sup> RRR = relative risk ratio; Ref. = referent. <sup>2</sup> R<sup>2</sup> = coefficient of variation (the proportion of the variation in the dependent variable that is predictable from the independent variable).

| Which recommendation do you give about the total amount of hay fed during drying-off? | Decrease<br>N (%) | No change<br>N (%) | Increase<br>N (%) | RRR <sup>1</sup> | <i>p</i> -value <sup>2</sup> |
|---------------------------------------------------------------------------------------|-------------------|--------------------|-------------------|------------------|------------------------------|
| Post-graduate training                                                                |                   |                    |                   |                  | R <sup>2</sup> = 0.03        |
| Yes                                                                                   | 20 (29)           | 40 (59)            |                   | Ref.             |                              |
| No                                                                                    | 16 (33)           | 19 (39)            |                   | 0.59             | 0.23                         |
| Yes                                                                                   | 20 (29)           |                    | 8 (12)            | Ref.             |                              |
| No                                                                                    | 16 (33)           |                    | 14 (29)           | 2.19             | 0.16                         |
| Yes                                                                                   |                   | 40 (59)            | 8 (12)            | Ref.             |                              |
| No                                                                                    |                   | 19 (39)            | 14 (29)           | 3.68             | 0.01                         |

<sup>1</sup> RRR = relative risk ratio; Ref. = referent. <sup>2</sup> R<sup>2</sup> = coefficient of variation (the proportion of the variation in the dependent variable that is predictable from the independent variable).

| Do you recommend controlling the udder by California Mastitis Test (CMT)? | Yes<br>N (%) | No<br>N (%) | OR <sup>1</sup> | <i>p</i> -value <sup>2</sup> |
|---------------------------------------------------------------------------|--------------|-------------|-----------------|------------------------------|
| Number of years in cattle practice                                        |              |             |                 | R <sup>2</sup> = 0.08        |
| <5                                                                        | 23 (77)      | 7 (23)      | Ref             |                              |
| 5-9                                                                       | 15 (68)      | 7 (32)      | 0.65            | 0.50                         |
| 10-14                                                                     | 8 (42)       | 11 (58)     | 0.22            | 0.02                         |
| 15-19                                                                     | 11 (52)      | 10 (48)     | 0.33            | 0.08                         |

|                             |         |         |      |                       |
|-----------------------------|---------|---------|------|-----------------------|
| 20-24                       | 7 (41)  | 10 (59) | 0.21 | 0.02                  |
| ≥25                         | 7 (35)  | 13 (65) | 0.16 | 0.005                 |
| Post-graduate training      |         |         |      | R <sup>2</sup> = 0.03 |
| Yes                         | 35 (46) | 41 (54) | Ref. |                       |
| No                          | 35 (67) | 17 (33) | 2.41 | 0.02                  |
| Year of degree <sup>4</sup> |         |         |      | R <sup>2</sup> = 0.09 |
| 1977-1991                   | 9 (36)  | 16 (64) | Ref. |                       |
| 1992-2001                   | 13 (50) | 13 (50) | 1.78 | 0.32                  |
| 2002-2008                   | 9 (38)  | 15 (62) | 1.07 | 0.91                  |
| 2009-2014                   | 18 (72) | 7 (28)  | 4.57 | 0.01                  |
| 2015-2020                   | 22 (76) | 7 (24)  | 5.59 | 0.004                 |

<sup>1</sup> OR = odds ratio; Ref. = referent. <sup>2</sup> R<sup>2</sup> = coefficient of variation (the proportion of the variation in the dependent variable that is predictable from the independent variable). <sup>3</sup> In addition, a lower proportion among veterinarians with ≥25 years (OR = 0.25,  $p = 0.04$ ) in cattle practice, compared to those with 5-9 years, stated that they recommend CMT at drying-off. <sup>4</sup> In addition, a larger proportion among veterinarians graduating 2009-2014 (OR = 1.45,  $p = 0.02$ ) or 2015-2020 (OR = 1.66,  $p = 0.006$ ) recommend CMT than among those graduating 2002-2008.

| Do you think the routines are important for the fertility of the cows in the beginning of next lactation? | Yes, very important<br>N (%) | Yes, rather important | No<br>N (%) | Don't know | RRR <sup>1</sup> | $p$ -value <sup>2</sup> |
|-----------------------------------------------------------------------------------------------------------|------------------------------|-----------------------|-------------|------------|------------------|-------------------------|
| Number of years in cattle practice <sup>3</sup>                                                           |                              |                       |             |            |                  | R <sup>2</sup> = 0.08   |
| <5                                                                                                        | 11 (37)                      | 12 (40)               |             |            | 0.18             | 0.05                    |
| 5-9                                                                                                       | 10 (45)                      | 7 (32)                |             |            | 0.12             | 0.02                    |
| 10-14                                                                                                     | 3 (16)                       | 6 (32)                |             |            | 0.33             | 0.29                    |
| 15-19                                                                                                     | 2 (10)                       | 12 (57)               |             |            | Ref              |                         |
| 20-24                                                                                                     | 6 (33)                       | 7 (39)                |             |            | 0.19             | 0.08                    |
| ≥25                                                                                                       | 2 (10)                       | 5 (25)                |             |            | 0.42             | 0.44                    |
| <5                                                                                                        | 11 (37)                      |                       | 2 (7)       |            | 0.06             | 0.01                    |
| 5-9                                                                                                       | 10 (45)                      |                       | 3 (14)      |            | 0.10             | 0.03                    |
| 10-14                                                                                                     | 3 (16)                       |                       | 1 (5)       |            | 0.11             | 0.12                    |
| 15-19                                                                                                     | 2 (10)                       |                       | 2 (10)      |            | 0.33             | 0.40                    |
| 20-24                                                                                                     | 6 (33)                       |                       | 2 (11)      |            | 0.11             | 0.06                    |
| ≥25                                                                                                       | 2 (10)                       |                       | 6 (30)      |            | Ref              |                         |
| <5                                                                                                        | 11 (37)                      |                       |             | 5 (17)     | 2.27             | 0.38                    |
| 5-9                                                                                                       | 10 (45)                      |                       |             | 2 (9)      | Ref              |                         |
| 10-14                                                                                                     | 3 (16)                       |                       |             | 9 (47)     | 15.0             | 0.008                   |
| 15-19                                                                                                     | 2 (10)                       |                       |             | 5 (24)     | 12.5             | 0.03                    |
| 20-24                                                                                                     | 6 (33)                       |                       |             | 3 (17)     | 2.5              | 0.38                    |
| ≥25                                                                                                       | 2 (10)                       |                       |             | 7 (35)     | 17.5             | 0.01                    |
| <5                                                                                                        |                              | 12 (40)               | 2 (7)       |            | 0.14             | 0.04                    |
| 5-9                                                                                                       |                              | 7 (32)                | 3 (14)      |            | 0.36             | 0.26                    |
| 10-14                                                                                                     |                              | 6 (32)                | 1 (5)       |            | 0.14             | 0.11                    |
| 15-19                                                                                                     |                              | 12 (57)               | 2 (10)      |            | 0.14             | 0.04                    |
| 20-24                                                                                                     |                              | 7 (39)                | 2 (11)      |            | 0.24             | 0.15                    |
| ≥25                                                                                                       |                              | 5 (25)                | 6 (30)      |            | Ref              |                         |
| <5                                                                                                        |                              |                       |             | 5 (17)     | 0.28             | 0.09                    |
| 5-9                                                                                                       |                              |                       |             | 2 (9)      | 0.19             | 0.08                    |

|       |         |        |        |      |      |
|-------|---------|--------|--------|------|------|
| 10-14 | 6 (32)  | 9 (47) | Ref    |      |      |
| 15-19 | 12 (57) | 5 (24) | 0.28   | 0.09 |      |
| 20-24 | 7 (39)  | 3 (17) | 0.29   | 0.15 |      |
| ≥25   | 5 (25)  | 7 (35) | 0.93   | 0.93 |      |
|       |         |        |        |      |      |
| <5    |         | 2 (7)  | 5 (17) | 0.28 | 0.34 |
| 5-9   |         | 3 (14) | 2 (9)  | 0.07 | 0.06 |
| 10-14 |         | 1 (5)  | 9 (47) | Ref  |      |
| 15-19 |         | 2 (10) | 5 (24) | 0.28 | 0.34 |
| 20-24 |         | 2 (11) | 3 (17) | 0.17 | 0.20 |
| ≥25   |         | 6 (30) | 7 (35) | 0.13 | 0.09 |

<sup>1</sup> RRR = relative risk ratio; Ref. = referent. <sup>2</sup> R<sup>2</sup> = coefficient of variation (the proportion of the variation in the dependent variable that is predictable from the independent variable). <sup>3</sup> In addition, among veterinarians with <5 years in cattle practice a larger proportion stated that they think the routines are very important for the fertility than among veterinarians with 10-14 (PR = 6.6,  $p = 0.03$ ) or ≥25 (OR = 7.7,  $p = 0.04$ ) years in cattle practice.

**Supplementary Table S4.** Significant associations between herd variables and responses to questions about routines during the dry period of dairy cows given by farmers ( $n = 340$ ) participating in a web-based questionnaire as analysed using univariable logistic or multinomial logistic regression models

| Do you have written routines for the dry period? | Yes<br>N (%) | No<br>N (%) | OR <sup>1</sup> | $p$ -value <sup>2</sup> |
|--------------------------------------------------|--------------|-------------|-----------------|-------------------------|
| Production system                                |              |             |                 | $R^2 = 0.01$            |
| Conventional                                     | 68 (25)      | 201 (75)    | Ref.            |                         |
| Organic                                          | 26 (39)      | 41 (61)     | 1.87            | 0.03                    |
| Milking system                                   |              |             |                 | $R^2 = 0.07$            |
| AMS <sup>3</sup>                                 | 43 (30)      | 99 (70)     | 3.01            | 0.002                   |
| Tie-stall                                        | 13 (13)      | 90 (87)     | Ref.            |                         |
| Parlour                                          | 30 (38)      | 49 (62)     | 4.24            | <0.001                  |
| Rotary                                           | 6 (67)       | 3 (33)      | 13.8            | 0.001                   |
| Combinations                                     | 2 (67)       | 1 (33)      | 13.8            | 0.04                    |
| Number of cows <sup>4</sup>                      |              |             |                 | $R^2 = 0.06$            |
| <53                                              | 12 (15)      | 70 (85)     | 0.20            | <0.001                  |
| 53 – 77                                          | 18 (22)      | 65 (78)     | 0.33            | 0.001                   |
| 78 – 137                                         | 25 (30)      | 59 (70)     | 0.50            | 0.03                    |
| ≥138                                             | 39 (46)      | 46 (54)     | Ref.            |                         |

<sup>1</sup> OR = odds ratio; Ref. = referent. <sup>2</sup>  $R^2$  = coefficient of variation (the proportion of the variation in the dependent variable that is predictable from the independent variable). <sup>3</sup> AMS = automatic milking system.

<sup>4</sup> In addition, more herds with 78-137 cows than herds <53 cows had written routines (RRR = 2.47,  $p = 0.02$ ).

| How many persons take care of these cows? | 1<br>N (%) | 2-3<br>N (%) | >3<br>N (%) | RRR <sup>1</sup> | $p$ -value <sup>2</sup> |
|-------------------------------------------|------------|--------------|-------------|------------------|-------------------------|
| Milking system                            |            |              |             |                  | $R^2 = 0.07$            |
| AMS <sup>3</sup>                          | 36 (26)    | 99 (70)      |             | 0.43             | 0.04                    |
| Tie-stall                                 | 37 (36)    | 64 (62)      |             | 0.27             | 0.002                   |
| Parlour                                   | 9 (11)     | 57 (72)      |             | Ref.             |                         |
| Rotary                                    | 0 (0)      | 5 (56)       |             | 0.39             | 0.99                    |
| Combinations                              | 1 (33)     | 2 (67)       |             | 0.32             | 0.37                    |
| AMS                                       | 36 (26)    |              | 6 (4)       | 0.11             | <0.001                  |
| Tie-stall                                 | 37 (36)    |              | 3 (3)       | 0.06             | <0.001                  |
| Parlour                                   | 9 (11)     |              | 13 (16)     | Ref.             |                         |
| Rotary                                    | 0 (0)      |              | 4 (44)      | -                | -                       |
| Combinations                              | 1 (33)     |              | 0 (0)       | -                | -                       |
| AMS                                       |            | 99 (70)      | 6 (4)       | 0.27             | 0.01                    |
| Tie-stall                                 |            | 64 (62)      | 3 (3)       | 0.20             | 0.02                    |
| Parlour                                   |            | 57 (72)      | 13 (16)     | Ref.             |                         |
| Rotary                                    |            | 5 (56)       | 4 (44)      | 3.51             | 0.09                    |
| Combinations                              |            | 2 (67)       | 0 (0)       | -                | -                       |
| Number of cows/herd                       |            |              |             |                  | $R^2 = 0.06$            |
| <53                                       | 36 (44)    | 44 (54)      |             | 0.25             | <0.001                  |
| 53-77                                     | 20 (24)    | 58 (70)      |             | 0.60             | 0.21                    |
| 78-137                                    | 14 (17)    | 66 (79)      |             | 0.97             | 0.95                    |
| ≥138                                      | 12 (14)    | 58 (68)      |             | Ref.             |                         |
| <53                                       | 36 (44)    |              | 2 (2)       | 0.04             | <0.001                  |
| 53-77                                     | 20 (24)    |              | 5 (6)       | 0.20             | 0.01                    |
| 78-137                                    | 14 (17)    |              | 4 (5)       | 0.23             | 0.03                    |
| ≥138                                      | 12 (14)    |              | 15 (18)     | Ref.             |                         |

|        |         |         |      |      |
|--------|---------|---------|------|------|
| <53    | 44 (54) | 2 (2)   | 0.18 | 0.03 |
| 53-77  | 58 (70) | 5 (6)   | 0.33 | 0.05 |
| 78-137 | 66 (79) | 4 (5)   | 0.23 | 0.01 |
| ≥138   | 58 (68) | 15 (18) | Ref. |      |

<sup>1</sup> RRR = relative risk ratio; Ref. = referent; <sup>2</sup> R<sup>2</sup> = coefficient of variation (the proportion of the variation in the dependent variable that is predictable from the independent variable). <sup>3</sup> AMS = automatic milking system.

| Do dry cows spend time with lactating cows?    | Yes,<br>≥75% of the<br>cows<br>N (%) | Yes,<br><75% of the<br>cows<br>N (%) | No<br>N (%) | RRR <sup>1</sup> | p-value <sup>2</sup>  |
|------------------------------------------------|--------------------------------------|--------------------------------------|-------------|------------------|-----------------------|
| Milk production, kg ECM <sup>3</sup> /cow/year |                                      |                                      |             |                  | R <sup>2</sup> = 0.03 |
| <9000                                          |                                      | 9 (23)                               | 17 (42)     | Ref.             |                       |
| 9000-11000                                     |                                      | 30 (16)                              | 135 (70)    | 0.42             | 0.06                  |
| ≥11000                                         |                                      | 10 (10)                              | 79 (79)     | 0.24             | 0.007                 |
| <9000                                          | 14 (35)                              |                                      | 17 (42)     | Ref.             |                       |
| 9000-11000                                     | 28 (14)                              |                                      | 135 (70)    | 0.25             | 0.001                 |
| ≥11000                                         | 11 (11)                              |                                      | 79 (79)     | 0.17             | <0.001                |
| <9000                                          | 14 (35)                              | 9 (23)                               |             | Ref.             |                       |
| 9000-11000                                     | 28 (14)                              | 30 (16)                              |             | 0.60             | 0.31                  |
| ≥11000                                         | 11 (11)                              | 10 (10)                              |             | 0.71             | 0.57                  |
| Milking system                                 |                                      |                                      |             |                  | R <sup>2</sup> = 0.06 |
| AMS <sup>4</sup>                               |                                      | 16 (11)                              | 105 (74)    | 0.30             | 0.001                 |
| Tie-stall                                      |                                      | 26 (25)                              | 52 (50)     | Ref.             |                       |
| Parlour                                        |                                      | 7 (9)                                | 64 (82)     | 0.22             | 0.001                 |
| Rotary                                         |                                      | 0 (0)                                | 9 (100)     | -                | -                     |
| Combinations                                   |                                      | 0 (0)                                | 3 (100)     | -                | -                     |
| AMS                                            | 20 (14)                              |                                      | 105 (74)    | 0.38             | 0.005                 |
| Tie-stall                                      | 26 (25)                              |                                      | 52 (50)     | Ref.             |                       |
| Parlour                                        | 7 (9)                                |                                      | 64 (82)     | 0.22             | 0.001                 |
| Rotary                                         | 0 (0)                                |                                      | 9 (100)     | -                | -                     |
| Combinations                                   | 0 (0)                                |                                      | 3 (100)     | -                | -                     |
| AMS                                            | 20 (14)                              | 16 (11)                              |             | 1.25             | 0.61                  |
| Tie-stall                                      | 26 (25)                              | 26 (25)                              |             | 1.00             | 1.00                  |
| Parlour                                        | 7 (9)                                | 7 (9)                                |             |                  |                       |
| Rotary                                         | 0 (0)                                | 0 (0)                                |             | -                | -                     |
| Combinations                                   | 0 (0)                                | 0 (0)                                |             | -                | -                     |
| Number of cows/herd                            |                                      |                                      |             |                  | R <sup>2</sup> = 0.11 |
| <53                                            |                                      | 22 (27)                              | 34 (41)     | Ref.             |                       |
| 53-77                                          |                                      | 12 (15)                              | 56 (68)     | 0.33             | 0.008                 |
| 78-137                                         |                                      | 12 (14)                              | 63 (75)     | 0.29             | 0.003                 |
| ≥138                                           |                                      | 3 (4)                                | 80 (94)     | 0.06             | <0.001                |
| <53                                            | 26 (32)                              |                                      | 34 (41)     | Ref.             |                       |
| 53-77                                          | 14 (17)                              |                                      | 56 (68)     | 0.33             | 0.005                 |
| 78-137                                         | 9 (11)                               |                                      | 63 (75)     | 0.19             | <0.001                |
| ≥138                                           | 2 (2)                                |                                      | 80 (94)     | 0.03             | <0.001                |
| <53                                            | 26 (32)                              | 22 (27)                              |             | Ref.             |                       |

|        |         |         |      |      |
|--------|---------|---------|------|------|
| 53-77  | 14 (17) | 12 (15) | 0.99 | 0.98 |
| 78-137 | 9 (11)  | 12 (14) | 0.63 | 0.39 |
| ≥138   | 2 (2)   | 3 (4)   | 0.56 | 0.55 |

<sup>1</sup> RRR = relative risk ratio; Ref. = referent; <sup>2</sup> R<sup>2</sup> = coefficient of variation (the proportion of the variation in the dependent variable that is predictable from the independent variable). <sup>3</sup> ECM = energy-corrected milk.

<sup>4</sup> AMS = automatic milking system.

| If dry cows do not spend time with lactating cows, are they in a separate section of the same stable? | Yes<br>N (%) | No<br>N (%) | OR <sup>1</sup> | <i>p</i> -value <sup>2</sup> |
|-------------------------------------------------------------------------------------------------------|--------------|-------------|-----------------|------------------------------|
| Milking system                                                                                        |              |             |                 | R <sup>2</sup> = 0.01        |
| AMS <sup>3</sup>                                                                                      | 51 (49)      | 54 (51)     | 3.70            | <0.001                       |
| Tie-stall                                                                                             | 26 (50)      | 28 (54)     | 3.36            | 0.004                        |
| Parlour                                                                                               | 51 (80)      | 51 (80)     | Ref.            |                              |
| Rotary                                                                                                | 5 (56)       | 6 (67)      | 1.96            | 0.38                         |
| Combinations                                                                                          | 2 (67)       | 2 (67)      | 1.96            | 0.59                         |
| Production system                                                                                     |              |             |                 | R <sup>2</sup> = 0.02        |
| Conventional                                                                                          | 66 (36)      | 119 (64)    | Ref.            |                              |
| Organic                                                                                               | 26 (54)      | 22 (46)     | 2.13            | 0.02                         |

<sup>1</sup> OR = odds ratio; Ref. = referent. <sup>2</sup> R<sup>2</sup> = coefficient of variation (the proportion of the variation in the dependent variable that is predictable from the independent variable). <sup>3</sup> AMS = automatic milking system.

| If dry cows do not spend time with lactating cows, are they in another stable? | Yes<br>N (%) | No<br>N (%) | OR <sup>1</sup> | <i>p</i> -value <sup>2</sup> |
|--------------------------------------------------------------------------------|--------------|-------------|-----------------|------------------------------|
| Milking system                                                                 |              |             |                 | R <sup>2</sup> = 0.01        |
| AMS <sup>3</sup>                                                               | 57 (54)      | 48 (46)     | 0.30            | 0.001                        |
| Tie-stall                                                                      | 26 (50)      | 26 (50)     | 0.25            | 0.001                        |
| Parlour                                                                        | 51 (80)      | 13 (20)     | Ref.            |                              |
| Rotary                                                                         | 5 (56)       | 4 (44)      | 0.32            | 0.12                         |
| Combinations                                                                   | 2 (67)       | 1 (33)      | 0.51            | 0.59                         |

<sup>1</sup> OR = odds ratio; Ref. = referent. <sup>2</sup> R<sup>2</sup> = coefficient of variation (the proportion of the variation in the dependent variable that is predictable from the independent variable). <sup>3</sup> AMS = automatic milking system.

| Are dry cows moved between sections?           | Yes,<br>≥75% of the<br>cows<br>N (%) | Yes,<br><75% of the<br>cows<br>N (%) | No<br>N (%) | RRR <sup>1</sup> | <i>p</i> -value <sup>2</sup> |
|------------------------------------------------|--------------------------------------|--------------------------------------|-------------|------------------|------------------------------|
| Milk production, kg ECM <sup>3</sup> /cow/year |                                      |                                      |             |                  | R <sup>2</sup> = 0.02        |
| <9000                                          |                                      | 5 (13)                               | 29 (74)     | 0.90             | 0.85                         |
| 9000-11000                                     |                                      | 31 (16)                              | 118 (61)    | 1.37             | 0.44                         |
| ≥11000                                         |                                      | 10 (10)                              | 52 (51)     | Ref.             |                              |
| <9000                                          | 5 (13)                               |                                      | 29 (74)     | 0.23             | 0.005                        |
| 9000-11000                                     | 45 (23)                              |                                      | 118 (61)    | 0.51             | 0.01                         |
| ≥11000                                         | 39 (39)                              |                                      | 52 (51)     | Ref.             |                              |
| <9000                                          | 5 (13)                               | 5 (13)                               |             | 0.26             | 0.02                         |
| 9000-11000                                     | 45 (23)                              | 31 (16)                              |             | 0.37             | 0.06                         |
| ≥11000                                         | 39 (39)                              | 10 (10)                              |             | Ref.             |                              |
| Milking system                                 |                                      |                                      |             |                  | R <sup>2</sup> = 0.02        |
| AMS <sup>4</sup>                               |                                      | 22 (15)                              | 83 (58)     | 1.23             | 0.58                         |
| Tie-stall                                      |                                      | 16 (15)                              | 74 (72)     | Ref.             |                              |

|                     |         |         |         |      |                       |
|---------------------|---------|---------|---------|------|-----------------------|
| Parlour             |         | 7 (9)   | 41 (52) | 0.79 | 0.63                  |
| Rotary              |         | 1 811)  | 2 (22)  | 2.31 | 0.50                  |
| Combinations        |         | 0 (0)   | 1 (33)  | -    | -                     |
| AMS                 | 37 (26) |         | 83 (58) | 2.54 | 0.01                  |
| Tie-stall           | 13 (16) |         | 74 (72) | Ref. |                       |
| Parlour             | 31 (39) |         | 41 (52) | 4.30 | <0.001                |
| Rotary              | 6 (67)  |         | 2 (22)  | 17.1 | 0.001                 |
| Combinations        | 2 (67)  |         | 1 (33)  | 11.4 | 0.05                  |
| AMS                 | 37 (26) | 22 (15) |         | 0.38 | 0.05                  |
| Tie-stall           | 13 (16) | 16 (15) |         | 0.18 | 0.002                 |
| Parlour             | 31 (39) | 7 (9)   |         | Ref. |                       |
| Rotary              | 6 (67)  | 1 811)  |         | 1.35 | 0.79                  |
| Combinations        | 2 (67)  | 0 (0)   |         | -    | -                     |
| Number of cows/herd |         |         |         |      | R <sup>2</sup> = 0.03 |
| <53                 |         | 17 (21) | 52 (64) | 1.27 | 0.59                  |
| 53-77               |         | 11 (13) | 56 (67) | 0.77 | 0.58                  |
| 78-137              |         | 8 (9)   | 52 (61) | 0.60 | 0.33                  |
| ≥138                |         | 10 (12) | 39 (46) | Ref. |                       |
| <53                 | 12 (15) |         | 52 (64) | 0.25 | <0.001                |
| 53-77               | 16 (19) |         | 56 (67) | 0.31 | 0.001                 |
| 78-137              | 25 (29) |         | 52 (61) | 0.52 | 0.05                  |
| ≥138                | 36 (42) |         | 39 (46) | Ref. |                       |
| <53                 | 12 (15) | 17 (21) |         | Ref. |                       |
| 53-77               | 16 (19) | 11 (13) |         | 2.06 | 0.18                  |
| 78-137              | 25 (29) | 8 (9)   |         | 4.43 | 0.007                 |
| ≥138                | 36 (42) | 10 (12) |         | 5.10 | 0.002                 |

<sup>1</sup> RRR = relative risk ratio; Ref. = referent; <sup>2</sup> R<sup>2</sup> = coefficient of variation (the proportion of the variation in the dependent variable that is predictable from the independent variable). <sup>3</sup> ECM = energy-corrected milk.

<sup>4</sup> AMS = automatic milking system.

| Are ≥75% of the dry cows teat dipped/sprayed? | Yes<br>N (%) | No<br>N (%) | OR <sup>1</sup> | <i>p</i> -value <sup>2</sup> |
|-----------------------------------------------|--------------|-------------|-----------------|------------------------------|
| Bulk milk SCC <sup>3</sup> , cells/ml         |              |             |                 | R <sup>2</sup> = 0.04        |
| <200 000                                      | 34 (15)      | 188 (85)    | Ref.            |                              |
| ≥200 000                                      | 5 (4)        | 108 (96)    | 0.26            | 0.006                        |

<sup>1</sup> OR = odds ratio; Ref. = referent. <sup>2</sup> R<sup>2</sup> = coefficient of variation (the proportion of the variation in the dependent variable that is predictable from the independent variable). <sup>3</sup> SCC = somatic cell count.

| Do you palpate the udder (if the udder of the dry cows is controlled)? | Yes<br>N (%) | No<br>N (%) | OR <sup>1</sup> | <i>p</i> -value <sup>2</sup> |
|------------------------------------------------------------------------|--------------|-------------|-----------------|------------------------------|
| Milk production, kg ECM <sup>3</sup> /cow/year                         |              |             |                 | R <sup>2</sup> = 0.03        |
| <9000                                                                  | 7 (58)       | 5 (42)      | 1.40            | 0.61                         |
| 9000-11000                                                             | 60 (71)      | 24 (29)     | 2.50            | 0.01                         |
| ≥11000                                                                 | 25 (50)      | 25 (50)     | Ref.            |                              |
| Milking system                                                         |              |             |                 | R <sup>2</sup> = 0.05        |
| AMS <sup>4</sup>                                                       | 44 (66)      | 23 (34)     | 2.35            | 0.06                         |
| Tie-stall                                                              | 34 (74)      | 12 (26)     | 3.49            | 0.01                         |
| Parlour                                                                | 13 (45)      | 16 (55)     | Ref.            |                              |
| Rotary                                                                 | 1 (25)       | 3 (75)      | 0.41            | 0.46                         |



<sup>1</sup> OR = odds ratio; Ref. = referent. <sup>2</sup> R<sup>2</sup> = coefficient of variation (the proportion of the variation in the dependent variable that is predictable from the independent variable). <sup>3</sup> ECM = energy-corrected milk. <sup>4</sup> AMS = automatic milking system.

**Supplementary Table S5.** Significant associations between veterinary variables and responses to questions about advice to farmers and personnel regarding the dry period of dairy cows given by veterinarians ( $n = 130$ ) participating in a web-based questionnaire as analysed using univariable logistic or multinomial logistic regression models

| Do you give advice to farmers/personnel?        | Yes, often<br>N (%) | Yes,<br>sometimes<br>N (%) | No,<br>never/rarely<br>N (%) | RRR <sup>1</sup> | $p$ -value <sup>2</sup> |
|-------------------------------------------------|---------------------|----------------------------|------------------------------|------------------|-------------------------|
| Number of years in cattle practice <sup>3</sup> |                     |                            |                              |                  | R <sup>2</sup> = 0.13   |
| <5                                              | 3 (10)              | 10 (33)                    |                              | 0.26             | 0.11                    |
| 5-9                                             | 8 (36)              | 7 (32)                     |                              | Ref              |                         |
| 10-14                                           | 2 (10)              | 14 (74)                    |                              | 0.12             | 0.02                    |
| 15-19                                           | 1 (5)               | 15 (71)                    |                              | 0.06             | 0.01                    |
| 20-24                                           | 2 (11)              | 13 (72)                    |                              | 0.13             | 0.03                    |
| ≥25                                             | 7 (35)              | 12 (60)                    |                              | 0.51             | 0.34                    |
| <5                                              |                     | 10 (33)                    | 17 (57)                      | Ref              |                         |
| 5-9                                             |                     | 7 (32)                     | 7 (32)                       | 0.59             | 0.43                    |
| 10-14                                           |                     | 14 (74)                    | 3 (16)                       | 0.13             | 0.006                   |
| 15-19                                           |                     | 15 (71)                    | 5 (24)                       | 0.20             | 0.01                    |
| 20-24                                           |                     | 13 (72)                    | 3 (17)                       | 0.14             | 0.008                   |
| ≥25                                             |                     | 12 (60)                    | 1 (5)                        | 0.05             | 0.007                   |
| <5                                              | 3 (10)              |                            | 17 (57)                      | Ref              |                         |
| 5-9                                             | 8 (36)              |                            | 7 (32)                       | 0.15             | 0.02                    |
| 10-14                                           | 2 (10)              |                            | 3 (16)                       | 0.26             | 0.23                    |
| 15-19                                           | 1 (5)               |                            | 5 (24)                       | 0.88             | 0.92                    |
| 20-24                                           | 2 (11)              |                            | 3 (17)                       | 0.26             | 0.23                    |
| ≥25                                             | 7 (35)              |                            | 1 (5)                        | 0.02             | 0.003                   |
| Post-graduate training                          |                     |                            |                              |                  | R <sup>2</sup> = 0.16   |
| Yes                                             | 21 (27)             | 50 (65)                    |                              | Ref.             |                         |
| No                                              | 2 (4)               | 21 (40)                    |                              | 0.23             | 0.06                    |
| Yes                                             |                     | 50 (65)                    | 6 (8)                        | Ref.             |                         |
| No                                              |                     | 21 (40)                    | 29 (56)                      | 11.5             | <0.001                  |
| Yes                                             | 21 (27)             |                            | 6 (8)                        | Ref.             |                         |
| No                                              | 2 (4)               |                            | 29 (56)                      | 50.7             | <0.001                  |
| Year of degree <sup>4</sup>                     |                     |                            |                              |                  | R <sup>2</sup> = 0.08   |
| 1977-1991                                       | 6 (23)              | 18 (69)                    |                              | 1.11             | 0.90                    |
| 1992-2001                                       | 4 (15)              | 17 (65)                    |                              | 0.78             | 0.78                    |
| 2002-2008                                       | 3 (12)              | 16 (67)                    |                              | 0.62             | 0.61                    |
| 2009-2014                                       | 7 (28)              | 10 (40)                    |                              | 2.33             | 0.30                    |
| 2015-2020                                       | 3 (10)              | 10 (34)                    |                              | Ref.             |                         |
| 1977-1991                                       |                     | 18 (69)                    | 2 (8)                        | 0.07             | 0.002                   |
| 1992-2001                                       |                     | 17 (65)                    | 5 (19)                       | 0.18             | 0.009                   |
| 2002-2008                                       |                     | 16 (67)                    | 5 (21)                       | 0.19             | 0.01                    |
| 2009-2014                                       |                     | 10 (40)                    | 8 (32)                       | 0.50             | 0.27                    |
| 2015-2020                                       |                     | 10 (34)                    | 16 (55)                      | Ref.             |                         |
| 1977-1991                                       | 6 (23)              |                            | 2 (8)                        | 0.06             | 0.007                   |
| 1992-2001                                       | 4 (15)              |                            | 5 (19)                       | 0.23             | 0.12                    |
| 2002-2008                                       | 3 (12)              |                            | 5 (21)                       | 0.31             | 0.23                    |
| 2009-2014                                       | 7 (28)              |                            | 8 (32)                       | 0.21             | 0.06                    |

| 2015-2020                                                                                                                                                                                                                                                                                                                                                                                                                                                                                                                                                                                                                                                                                                                                                                                                                                                              | 3 (10) | 16 (55) | Ref. |
|------------------------------------------------------------------------------------------------------------------------------------------------------------------------------------------------------------------------------------------------------------------------------------------------------------------------------------------------------------------------------------------------------------------------------------------------------------------------------------------------------------------------------------------------------------------------------------------------------------------------------------------------------------------------------------------------------------------------------------------------------------------------------------------------------------------------------------------------------------------------|--------|---------|------|
| <sup>1</sup> RRR = relative risk ratio; Ref. = referent. <sup>2</sup> R <sup>2</sup> = coefficient of variation (the proportion of the variation in the dependent variable that is predictable from the independent variable). <sup>3</sup> In addition, a larger proportion among veterinarians with 5-10 years (RRR = 0.08, <i>p</i> = 0.03) in practice stated that they rarely/never give advice compared to veterinarians with ≥25 years in practice. Moreover, a larger proportion among veterinarians with 15-19 years in practice (RRR = 0.03, <i>p</i> = 0.02) stated that they rarely/never give advice compared to those with ≥25 years in practice. <sup>4</sup> In addition, a larger proportion among veterinarians graduating 2009-2014 (RRR = 7.20, <i>p</i> = 0.03) stated that they rarely/never give advice compared to those graduating 1977-1991. |        |         |      |

| Do you think teat dipping/spraying is important? | Yes, very<br>N (%) | Yes, rather<br>N (%) | No<br>N (%) | Don't know<br>N (%) | RRR <sup>1</sup> | <i>p</i> -value <sup>2</sup> |
|--------------------------------------------------|--------------------|----------------------|-------------|---------------------|------------------|------------------------------|
| Post-graduate training                           |                    |                      |             |                     |                  | R <sup>2</sup> = 0.16        |
| Yes                                              | 28 (36)            | 26 (34)              |             |                     | Ref.             |                              |
| No                                               | 12 (23)            | 10 (19)              |             |                     | 1.11             | 0.83                         |
| Yes                                              |                    | 26 (34)              | 20 (26)     |                     | Ref.             |                              |
| No                                               |                    | 10 (19)              | 14 (27)     |                     | 1.82             | 0.24                         |
| Yes                                              |                    | 26 (34)              |             | 3 (4)               | Ref.             |                              |
| No                                               |                    | 10 (19)              |             | 16 (31)             | 13.9             | <0.001                       |
| Yes                                              | 28 (36)            |                      | 20 (26)     |                     | Ref.             |                              |
| No                                               | 12 (23)            |                      | 14 (27)     |                     | 1.63             | 0.32                         |
| Yes                                              | 28 (36)            |                      |             | 3 (4)               | Ref.             |                              |
| No                                               | 12 (23)            |                      |             | 16 (31)             | 12.4             | <0.001                       |
| Yes                                              |                    |                      | 20 (26)     | 3 (4)               | Ref.             |                              |
| No                                               |                    |                      | 14 (27)     | 16 (31)             | 7.62             | 0.005                        |

<sup>1</sup> RRR = relative risk ratio; Ref. = referent. <sup>2</sup> R<sup>2</sup> = coefficient of variation (the proportion of the variation in the dependent variable that is predictable from the independent variable).

| Do you think control of the udder is important? | Yes, very<br>N (%) | Yes, rather<br>N (%) | No<br>N (%) | Don't know<br>N (%) | RRR <sup>1</sup> | <i>p</i> -value <sup>2</sup> |
|-------------------------------------------------|--------------------|----------------------|-------------|---------------------|------------------|------------------------------|
| Post-graduate training                          |                    |                      |             |                     |                  | R <sup>2</sup> = 0.05        |
| Yes                                             | 41 (53)            | 34 (44)              |             |                     | Ref.             |                              |
| No                                              | 28 (54)            | 14 (27)              |             |                     | 1.66             | 0.21                         |
| Yes                                             |                    | 34 (44)              | 1 (1)       |                     | Ref.             |                              |
| No                                              |                    | 14 (27)              | 3 (6)       |                     | 7.29             | 0.10                         |
| Yes                                             |                    | 34 (44)              |             | 1 (1)               | Ref.             |                              |
| No                                              |                    | 14 (27)              |             | 7 (13)              | 17.0             | 0.01                         |
| Yes                                             | 41 (53)            |                      | 1 (1)       |                     | Ref.             |                              |
| No                                              | 28 (54)            |                      | 3 (6)       |                     | 4.39             | 0.21                         |
| Yes                                             | 41 (53)            |                      |             | 1 (1)               | Ref.             |                              |
| No                                              | 28 (54)            |                      |             | 7 (13)              | 10.2             | 0.03                         |
| Yes                                             |                    |                      | 1 (1)       | 1 (1)               | Ref.             |                              |

|    |       |        |      |      |
|----|-------|--------|------|------|
| No | 3 (6) | 7 (13) | 2.33 | 0.59 |
|----|-------|--------|------|------|

<sup>1</sup> RRR = relative risk ratio; Ref. = referent. <sup>2</sup> R<sup>2</sup> = coefficient of variation (the proportion of the variation in the dependent variable that is predictable from the independent variable).
